# Supplementary material for: Risks of myocarditis, pericarditis, and cardiac arrhythmias associated with COVID-19 vaccination or SARS-CoV-2 infection
Source: PubMed Central journal article supplement (PMC8863574; doi:10.1038/s41591-021-01630-0), 2021-12-14
Supplement: 41591_2021_1630_MOESM1_ESM.pdf [file 41591_2021_1630_MOESM1_ESM.pdf]

---

**Supplementary information**

---

**Risks of myocarditis, pericarditis, and cardiac arrhythmias associated with COVID-19 vaccination or SARS-CoV-2 infection**

---

In the format provided by the authors and unedited

**Supplementary table 1: Demographic characteristics of patients who died for the individual outcomes in the 1-28 days following a first or second dose of COVID-19 vaccine or SARS-CoV-2 infection amongst the vaccinated population in England from December 1 2020 until August 24 2021 (cells with \* are suppressed).**

|                                             | Deaths for myocarditis               |                       |           |                         |                       |           |                          | Deaths for pericarditis |                       |           |                         |                       |           |                          |
|---------------------------------------------|--------------------------------------|-----------------------|-----------|-------------------------|-----------------------|-----------|--------------------------|-------------------------|-----------------------|-----------|-------------------------|-----------------------|-----------|--------------------------|
|                                             | 1-28 days post 1st dose              |                       |           | 1-28 days post 2nd dose |                       |           | 1-28 days post test      | 1-28 days post 1st dose |                       |           | 1-28 days post 2nd dose |                       |           | 1-28 days post test      |
|                                             | ChAdOx1nCoV-19 vaccine               | BNT162b2 mRNA vaccine | mRNA-1273 | ChAdOx1nCoV-19 vaccine  | BNT162b2 mRNA vaccine | mRNA-1273 | Positive SARS-CoV-2 test | ChAdOx1nCoV-19 vaccine  | BNT162b2 mRNA vaccine | mRNA-1273 | ChAdOx1nCoV-19 vaccine  | BNT162b2 mRNA vaccine | mRNA-1273 | Positive SARS-CoV-2 test |
| Total number of people                      | 31                                   | 15                    | 0         | 5                       | 10                    | 0         | *                        | *                       | *                     | 0         | *                       | *                     | 0         | 0                        |
| Women                                       | 38.7 (12)                            | 60.0 (9)              | -         | *                       | 50.0 (5)              | -         | *                        | *                       | *                     | -         | *                       | *                     | -         | -                        |
| Men                                         | 58.1 (18)                            | 40.0 (6)              | -         | *                       | 50.0 (5)              | -         | *                        | *                       | *                     | -         | *                       | *                     | -         | -                        |
| Not recorded                                | 3.2 (1)                              | 0                     | -         | *                       | 0                     | -         | 0                        | 0                       | 0                     | -         | 0                       | 0                     | -         | -                        |
| Mean age (SD)                               | 64.4 (17.7)                          | 72.2 (16.8)           | -         | 70.6 (4.8)              | 74.5 (19.3)           | -         | 82.3 (10.6)              | 71.5 (6.0)              | 86.0 (.)              | -         | 74.3 (16.8)             | 81.0 (.)              | -         | -                        |
| Days between deaths and exposure (mean, SD) | 12.7 (7.8)                           | 14.1 (7.6)            | -         | 9.6 (6.9)               | 11.3 (5.2)            | -         | 12.0 (7.8)               | 8.3 (3.0)               | 21.0 (.)              | -         | 10.7 (9.6)              | 16.0 (.)              | -         | -                        |
|                                             | <b>Deaths for cardiac arrhythmia</b> |                       |           |                         |                       |           |                          |                         |                       |           |                         |                       |           |                          |

|                                             | 1-28 days post 1st dose |                       |           | 1-28 days post 2nd dose |                       |           | 1-28 days post test      |  |  |  |  |  |  |
|---------------------------------------------|-------------------------|-----------------------|-----------|-------------------------|-----------------------|-----------|--------------------------|--|--|--|--|--|--|
|                                             | ChAdOx1nCoV-19 vaccine  | BNT162b2 mRNA vaccine | mRNA-1273 | ChAdOx1nCoV-19 vaccine  | BNT162b2 mRNA vaccine | mRNA-1273 | Positive SARS-CoV-2 test |  |  |  |  |  |  |
| Total number of people                      | 904                     | 755                   | 0         | 478                     | 524                   | 0         | 131                      |  |  |  |  |  |  |
| Women                                       | 54.1 (489)              | 47.7 (360)            | -         | 53.6 (256)              | 46.8 (245)            | -         | 50.4 (66)                |  |  |  |  |  |  |
| Men                                         | 45.4 (410)              | 51.7 (390)            | -         | 45.6 (218)              | 52.9 (277)            | -         | 48.9 (64)                |  |  |  |  |  |  |
| Not recorded                                | 0.6 (5)                 | 0.7 (5)               | -         | 0.8 (4)                 | 0.4 (2)               | -         | 0.8 (1)                  |  |  |  |  |  |  |
| Mean age (SD)                               | 84.9 (9.6)              | 85.7 (7.4)            | -         | 84.3 (9.8)              | 85.6 (7.6)            | -         | 85.8 (6.8)               |  |  |  |  |  |  |
| Days between deaths and exposure (mean, SD) | 14.5 (8.2)              | 14.1 (7.7)            | -         | 15.0 (8.0)              | 15.1 (8.0)            | -         | 14.5 (6.8)               |  |  |  |  |  |  |

**Supplementary table 2: Incidence rate ratios (IRR 95% CI) by sex for the outcomes in pre-defined risk periods immediately before and after exposure to vaccination and before and after a positive SARS-CoV-2 test result, adjusted for calendar time from December 1 2020 to August 24 2021 (cells with < 5 are suppressed).**

|                     |                                        | ChAdOx1 vaccine |                   | BNT162b2 mRNA vaccine |                   | mRNA-1273 vaccine |              | Positive SARS-CoV-2 test |                       |
|---------------------|----------------------------------------|-----------------|-------------------|-----------------------|-------------------|-------------------|--------------|--------------------------|-----------------------|
|                     | Time period                            | events          | IRR (95% CI)      | events                | IRR (95% CI)      | events            | IRR (95% CI) | events                   | IRR (95% CI)          |
| <b>Women</b>        |                                        |                 |                   |                       |                   |                   |              |                          |                       |
| <b>Myocarditis</b>  | Baseline                               | 230             | 1.00              | 163                   | 1.00              | 6                 | 1.00         | 40                       | 1.00                  |
|                     | -28 to -1 days: 1st dose/positive test | 32              | 0.72 (0.48, 1.07) | 15                    | 0.54 (0.31, 0.93) | *                 | n/a          | 14                       | 3.40 (1.80, 6.45)     |
|                     | 0 day: 1st dose/positive test          | *               | 1.41 (0.35, 5.72) | *                     | 1.96 (0.48, 7.95) | *                 | n/a          | 13                       | 74.94 (38.98, 144.09) |
|                     | 1-7 days: 1st dose/positive test       | 19              | 1.86 (1.13, 3.06) | 11                    | 1.31 (0.69, 2.48) | *                 | n/a          | 28                       | 23.06 (13.79, 38.55)  |
|                     | 8-14 days: 1st dose/positive test      | 11              | 1.02 (0.55, 1.91) | 13                    | 1.55 (0.85, 2.81) | *                 | n/a          | 17                       | 14.06 (7.77, 25.46)   |
|                     | 15-21 days: 1st dose/positive test     | 14              | 1.26 (0.72, 2.22) | 13                    | 1.66 (0.92, 2.99) | *                 | n/a          | 7                        | 6.09 (2.68, 13.82)    |
|                     | 22-28 days: 1st dose/positive test     | 14              | 1.30 (0.74, 2.28) | 10                    | 1.47 (0.76, 2.83) | *                 | n/a          | *                        | n/a                   |
|                     | -28 to -1 days: 2nd dose               | 18              | 0.51 (0.31, 0.84) | 17                    | 0.84 (0.49, 1.43) | *                 | n/a          |                          |                       |
|                     | 0 day: 2nd dose                        | *               | n/a               | *                     | n/a               | *                 | n/a          |                          |                       |
|                     | 1-7 days: 2nd dose                     | *               | 0.22 (0.05, 0.88) | 8                     | 1.45 (0.70, 3.00) | *                 | n/a          |                          |                       |
|                     | 8-14 days: 2nd dose                    | 6               | 0.65 (0.28, 1.48) | 9                     | 1.62 (0.81, 3.23) | *                 | n/a          |                          |                       |
|                     | 15-21 days: 2nd dose                   | 5               | 0.54 (0.22, 1.33) | 6                     | 1.11 (0.48, 2.55) | *                 | n/a          |                          |                       |
|                     | 22-28 days: 2nd dose                   | 10              | 1.08 (0.56, 2.06) | *                     | 0.74 (0.27, 2.01) | *                 | n/a          |                          |                       |
| <b>Pericarditis</b> | Baseline                               | 205             | 1.00              | 142                   | 1.00              | *                 | 1.00         | 29                       | 1.00                  |

|                           |                                                |       |                   |       |                   |     |                   |      |                       |
|---------------------------|------------------------------------------------|-------|-------------------|-------|-------------------|-----|-------------------|------|-----------------------|
|                           | -28 to -1 days: 1st dose/positive test         | 23    | 0.58 (0.37, 0.91) | 14    | 0.61 (0.35, 1.08) | *   | n/a               | 8    | 3.20 (1.40, 7.31)     |
|                           | 0 day: 1st dose/positive test                  | *     | n/a               | *     | n/a               | *   | n/a               | 5    | 52.31 (19.40, 141.05) |
|                           | 1-7 days: 1st dose/positive test               | 3     | 0.27 (0.09, 0.87) | 6     | 0.97 (0.42, 2.23) | *   | n/a               | 5    | 7.95 (2.96, 21.31)    |
|                           | 8-14 days: 1st dose/positive test              | 10    | 0.88 (0.46, 1.70) | *     | 0.60 (0.22, 1.65) | *   | n/a               | *    | 6.19 (2.11, 18.18)    |
|                           | 15-21 days: 1 <sup>st</sup> dose/positive test | 6     | 0.49 (0.22, 1.13) | *     | 0.46 (0.14, 1.45) | *   | n/a               | *    | n/a                   |
|                           | 22-28 days: 1st dose/positive test             | 8     | 0.63 (0.31, 1.30) | 9     | 1.29 (0.65, 2.57) | *   | n/a               | *    | 2.41 (0.57, 10.22)    |
|                           | -28 to -1 days: 2nd dose                       | 12    | 0.26 (0.14, 0.47) | 11    | 0.40 (0.21, 0.75) | *   | n/a               |      |                       |
|                           | 0 day: 2nd dose                                | *     | n/a               | *     | 1.83 (0.45, 7.44) | *   | n/a               |      |                       |
|                           | 1-7 days: 2nd dose                             | 7     | 0.64 (0.30, 1.38) | 5     | 0.67 (0.27, 1.65) | *   | n/a               |      |                       |
|                           | 8-14 days: 2nd dose                            | 9     | 0.81 (0.41, 1.61) | *     | 0.57 (0.21, 1.56) | *   | n/a               |      |                       |
|                           | 15-21 days: 2nd dose                           | 11    | 1.03 (0.55, 1.92) | 9     | 1.26 (0.63, 2.52) | *   | n/a               |      |                       |
|                           | 22-28 days: 2nd dose                           | 5     | 0.50 (0.20, 1.22) | 5     | 0.70 (0.28, 1.74) | *   | n/a               |      |                       |
| <b>Cardiac arrhythmia</b> | Baseline                                       | 56585 | 1.00              | 55963 | 1.00              | 758 | 1.00              | 8125 | 1.00                  |
|                           | -28 to -1 days: 1st dose/positive test         | 8174  | 0.75 (0.73, 0.77) | 6097  | 0.69 (0.67, 0.71) | 111 | 0.90 (0.74, 1.10) | 3286 | 4.46 (4.27, 4.65)     |
|                           | 0 day: 1st dose/positive test                  | 162   | 0.38 (0.33, 0.45) | 117   | 0.33 (0.28, 0.40) | 6   | 1.46 (0.65, 3.27) | 1725 | 57.83 (54.81, 61.01)  |
|                           | 1-7 days: 1st dose/positive test               | 2844  | 0.94 (0.90, 0.98) | 1878  | 0.75 (0.72, 0.79) | 21  | 0.73 (0.47, 1.13) | 1949 | 9.19 (8.73, 9.67)     |
|                           | 8-14 days: 1st dose/positive test              | 2870  | 0.91 (0.88, 0.95) | 2258  | 0.87 (0.83, 0.91) | 19  | 0.69 (0.44, 1.09) | 1111 | 5.10 (4.78, 5.43)     |
|                           | 15-21 days: 1 <sup>st</sup> dose/positive test | 3028  | 0.95 (0.91, 0.99) | 2317  | 0.88 (0.84, 0.91) | 19  | 0.76 (0.48, 1.20) | 472  | 2.07 (1.89, 2.27)     |

|                                           |                                                   |          |                   |      |                   |      |                      |      |                       |
|-------------------------------------------|---------------------------------------------------|----------|-------------------|------|-------------------|------|----------------------|------|-----------------------|
|                                           | 22-28 days:<br>1st dose/positive test             | 2909     | 0.90 (0.87, 0.94) | 2202 | 0.86 (0.83, 0.90) | 19   | 0.83 (0.53, 1.31)    | 381  | 1.59 (1.43, 1.76)     |
|                                           | -28 to -1 days: 2nd<br>dose                       | 8811     | 0.75 (0.73, 0.77) | 7006 | 0.73 (0.71, 0.75) | 22   | 0.72 (0.46, 1.11)    |      |                       |
|                                           | 0 day: 2nd dose                                   | 118      | 0.28 (0.23, 0.33) | 116  | 0.30 (0.25, 0.37) | *    | n/a                  |      |                       |
|                                           | 1-7 days: 2nd dose                                | 2527     | 0.86 (0.82, 0.89) | 2272 | 0.85 (0.82, 0.89) | 14   | 2.37 (1.38, 4.07)    |      |                       |
|                                           | 8-14 days: 2nd dose                               | 2759     | 0.95 (0.91, 0.99) | 2503 | 0.94 (0.90, 0.98) | 7    | 1.49 (0.70, 3.16)    |      |                       |
|                                           | 15-21 days: 2nd dose                              | 2856     | 1.00 (0.97, 1.04) | 2595 | 0.98 (0.94, 1.02) | 3    | 0.86 (0.28, 2.70)    |      |                       |
|                                           | 22-28 days: 2nd dose                              | 2730     | 0.98 (0.95, 1.02) | 2537 | 0.97 (0.93, 1.01) | 5    | 2.17 (0.89, 5.29)    |      |                       |
| <b>Men</b>                                |                                                   |          |                   |      |                   |      |                      |      |                       |
| <b>Myocarditis</b>                        | Baseline                                          | 318      | 1.00              | 234  | 1.00              | 16   | 1.00                 | 79   | 1.00                  |
|                                           | -28 to -1 days: 1st<br>dose/positive test         | 49       | 0.76 (0.55, 1.05) | 34   | 0.91 (0.63, 1.32) | *    | 0.58 (0.12, 2.69)    | 18   | 2.54 (1.49, 4.34)     |
|                                           | 0 day: 1st<br>dose/positive test                  | *        | n/a               | *    | n/a               | *    | n/a                  | 23   | 80.42 (49.25, 131.32) |
|                                           | 1-7 days: 1st<br>dose/positive test               | 28       | 1.73 (1.15, 2.60) | 16   | 1.59 (0.95, 2.67) | 7    | 11.76 (4.75, 29.13)  | 40   | 19.94 (13.27, 29.97)  |
|                                           | 8-14 days: 1st<br>dose/positive test              | 24       | 1.35 (0.87, 2.09) | 10   | 0.98 (0.52, 1.87) | *    | n/a                  | 20   | 9.50 (5.72, 15.80)    |
|                                           | 15-21 days:<br>1 <sup>st</sup> dose/positive test | 16       | 0.89 (0.53, 1.50) | 8    | 0.77 (0.38, 1.57) | *    | n/a                  | 11   | 4.94 (2.60, 9.40)     |
|                                           | 22-28 days:<br>1st dose/positive test             | 15       | 0.82 (0.48, 1.40) | 13   | 1.26 (0.71, 2.24) | *    | n/a                  | 10   | 4.15 (2.12, 8.12)     |
|                                           | -28 to -1 days: 2nd<br>dose                       | 40       | 0.77 (0.54, 1.09) | 31   | 1.09 (0.73, 1.62) | *    | 3.47 (0.66, 18.17)   |      |                       |
|                                           | 0 day: 2nd dose                                   | *        | n/a               | *    | n/a               | *    | n/a                  |      |                       |
|                                           | 1-7 days: 2nd dose                                | 11       | 0.88 (0.47, 1.62) | 15   | 2.06 (1.20, 3.54) | *    | 27.80 (6.39, 120.88) |      |                       |
|                                           | 8-14 days: 2nd dose                               | 21       | 1.74 (1.10, 2.76) | 6    | 0.87 (0.38, 1.99) | *    | n/a                  |      |                       |
|                                           | 15-21 days: 2nd dose                              | 14       | 1.20 (0.69, 2.08) | 8    | 1.23 (0.60, 2.53) | *    | n/a                  |      |                       |
|                                           | 22-28 days: 2nd dose                              | 14       | 1.23 (0.71, 2.12) | 8    | 1.27 (0.62, 2.62) | *    | n/a                  |      |                       |
|                                           | <b>Pericarditis</b>                               | Baseline | 375               | 1.00 | 272               | 1.00 | 10                   | 1.00 | 66                    |
| -28 to -1 days: 1st<br>dose/positive test |                                                   | 41       | 0.53 (0.38, 0.75) | 28   | 0.63 (0.42, 0.94) | *    | 1.93 (0.60, 6.23)    | 21   | 3.80 (2.26, 6.39)     |

|                           |                                                |       |                   |       |                   |     |                   |      |                      |
|---------------------------|------------------------------------------------|-------|-------------------|-------|-------------------|-----|-------------------|------|----------------------|
|                           | 0 day: 1st dose/positive test                  | *     | n/a               | *     | n/a               | *   | n/a               | 6    | 27.81 (11.84, 65.30) |
|                           | 1-7 days: 1st dose/positive test               | 15    | 0.71 (0.42, 1.20) | 5     | 0.40 (0.16, 0.97) | *   | n/a               | 6    | 3.70 (1.58, 8.66)    |
|                           | 8-14 days: 1st dose/positive test              | 24    | 1.08 (0.71, 1.65) | 5     | 0.39 (0.16, 0.95) | *   | n/a               | 5    | 2.92 (1.16, 7.33)    |
|                           | 15-21 days: 1 <sup>st</sup> dose/positive test | 17    | 0.73 (0.44, 1.20) | 16    | 1.27 (0.76, 2.12) | *   | n/a               | *    | 1.70 (0.53, 5.46)    |
|                           | 22-28 days: 1st dose/positive test             | 18    | 0.76 (0.47, 1.23) | 11    | 0.87 (0.47, 1.60) | *   | n/a               | *    | n/a                  |
|                           | -28 to -1 days: 2nd dose                       | 46    | 0.51 (0.37, 0.71) | 24    | 0.51 (0.33, 0.78) | *   | n/a               |      |                      |
|                           | 0 day: 2nd dose                                | *     | n/a               | *     | n/a               | *   | n/a               |      |                      |
|                           | 1-7 days: 2nd dose                             | 30    | 1.36 (0.92, 2.00) | 7     | 0.53 (0.25, 1.13) | *   | n/a               |      |                      |
|                           | 8-14 days: 2nd dose                            | 20    | 0.93 (0.58, 1.47) | 12    | 0.92 (0.51, 1.66) | *   | n/a               |      |                      |
|                           | 15-21 days: 2nd dose                           | 25    | 1.18 (0.77, 1.79) | 12    | 0.93 (0.52, 1.68) | *   | n/a               |      |                      |
|                           | 22-28 days: 2nd dose                           | 10    | 0.49 (0.26, 0.92) | 21    | 1.70 (1.08, 2.69) | *   | n/a               |      |                      |
| <b>Cardiac arrhythmia</b> | Baseline                                       | 61748 | 1.00              | 57988 | 1.00              | 463 | 1.00              | 6994 | 1.00                 |
|                           | -28 to -1 days: 1st dose/positive test         | 9387  | 0.81 (0.79, 0.82) | 6670  | 0.75 (0.73, 0.77) | 73  | 0.91 (0.71, 1.17) | 3332 | 5.24 (5.02, 5.48)    |
|                           | 0 day: 1st dose/positive test                  | 127   | 0.29 (0.24, 0.34) | 115   | 0.32 (0.27, 0.39) | *   | 1.12 (0.36, 3.48) | 2122 | 83.82 (79.71, 88.15) |
|                           | 1-7 days: 1st dose/positive test               | 3026  | 0.95 (0.92, 0.99) | 2079  | 0.82 (0.78, 0.86) | 17  | 0.93 (0.57, 1.51) | 2644 | 14.70 (14.03, 15.40) |
|                           | 8-14 days: 1st dose/positive test              | 3111  | 0.94 (0.91, 0.98) | 2578  | 0.97 (0.93, 1.01) | 21  | 1.19 (0.77, 1.85) | 1531 | 8.28 (7.83, 8.76)    |
|                           | 15-21 days: 1 <sup>st</sup> dose/positive test | 3213  | 0.95 (0.91, 0.98) | 2654  | 0.97 (0.94, 1.01) | 24  | 1.43 (0.95, 2.16) | 494  | 2.57 (2.34, 2.81)    |
|                           | 22-28 days: 1st dose/positive test             | 3218  | 0.93 (0.90, 0.97) | 2388  | 0.91 (0.87, 0.95) | 16  | 1.01 (0.61, 1.67) | 357  | 1.76 (1.58, 1.96)    |
|                           | -28 to -1 days: 2nd dose                       | 9784  | 0.76 (0.74, 0.78) | 8004  | 0.78 (0.76, 0.80) | 16  | 0.61 (0.36, 1.01) |      |                      |
|                           | 0 day: 2nd dose                                | 147   | 0.31 (0.27, 0.37) | 141   | 0.34 (0.29, 0.41) | *   | n/a               |      |                      |
|                           | 1-7 days: 2nd dose                             | 2708  | 0.83 (0.80, 0.86) | 2464  | 0.86 (0.82, 0.89) | 8   | 1.48 (0.73, 3.01) |      |                      |

|  |                      |      |                   |      |                   |   |                   |  |  |
|--|----------------------|------|-------------------|------|-------------------|---|-------------------|--|--|
|  | 8-14 days: 2nd dose  | 3172 | 0.98 (0.95, 1.02) | 2785 | 0.96 (0.92, 1.00) | 6 | 1.31 (0.58, 2.97) |  |  |
|  | 15-21 days: 2nd dose | 3161 | 1.00 (0.96, 1.04) | 2899 | 1.00 (0.96, 1.04) | * | 0.83 (0.27, 2.62) |  |  |
|  | 22-28 days: 2nd dose | 3102 | 1.00 (0.97, 1.04) | 2890 | 1.01 (0.97, 1.05) | * | 0.78 (0.19, 3.16) |  |  |

**Supplementary table 3a: Incidence rate ratios (IRR 95% CI) by age groups (older or younger than 40) for the outcomes in pre-defined risk periods immediately before and after exposure to vaccination and before and after a positive SARS-CoV-2 test result, adjusted for calendar time from December 1 2020 to August 24 2021 (cells with < 5 are suppressed).**

|                    |                                        | ChAdOx1 vaccine |                   | BNT162b2 mRNA vaccine |                    | mRNA-1273 vaccine |                     | Positive SARS-CoV-2 test |                      |
|--------------------|----------------------------------------|-----------------|-------------------|-----------------------|--------------------|-------------------|---------------------|--------------------------|----------------------|
|                    | Time period                            | events          | IRR (95% CI)      | events                | IRR (95% CI)       | events            | IRR (95% CI)        | events                   | IRR (95% CI)         |
| <b>Age &lt;40</b>  |                                        |                 |                   |                       |                    |                   |                     |                          |                      |
| <b>Myocarditis</b> | Baseline                               | 95              | 1.00              | 120                   | 1.00               | 16                | 1.00                | 37                       | 1.00                 |
|                    | -28 to -1 days: 1st dose/positive test | 8               | 0.38 (0.18, 0.81) | 15                    | 0.96 (0.55, 1.68)  | *                 | 0.77 (0.17, 3.51)   | 7                        | 1.75 (0.76, 4.05)    |
|                    | 0 day: 1st dose/positive test          | *               | n/a               | *                     | 3.30 (0.81, 13.50) | *                 | n/a                 | 5                        | 31.41 (11.91, 82.80) |
|                    | 1-7 days: 1st dose/positive test       | 14              | 2.49 (1.36, 4.58) | 14                    | 3.16 (1.77, 5.66)  | 6                 | 10.92 (4.09, 29.16) | 10                       | 9.06 (4.31, 19.02)   |
|                    | 8-14 days: 1st dose/positive test      | *               | 0.34 (0.08, 1.41) | 11                    | 2.30 (1.20, 4.41)  | *                 | n/a                 | *                        | n/a                  |
|                    | 15-21 days: 1st dose/positive test     | *               | 0.68 (0.24, 1.90) | 5                     | 1.11 (0.45, 2.77)  | *                 | n/a                 | *                        | 2.97 (0.90, 9.85)    |
|                    | 22-28 days: 1st dose/positive test     | *               | n/a               | *                     | 0.68 (0.21, 2.18)  | *                 | n/a                 | *                        | 2.67 (0.79, 8.99)    |
|                    | -28 to -1 days: 2nd dose               | 5               | 0.39 (0.15, 0.99) | 7                     | 0.91 (0.41, 2.05)  | *                 | 4.62 (0.79, 26.97)  |                          |                      |
|                    | 0 day: 2nd dose                        | *               | n/a               | *                     | n/a                | *                 | n/a                 |                          |                      |



|                           |                                        |      |                   |       |                    |     |                      |      |                     |
|---------------------------|----------------------------------------|------|-------------------|-------|--------------------|-----|----------------------|------|---------------------|
|                           | 1-7 days: 2nd dose                     | *    | 0.60 (0.14, 2.49) | 14    | 8.15 (4.37, 15.20) | *   | 44.43 (8.92, 221.24) |      |                     |
|                           | 8-14 days: 2nd dose                    | 11   | 3.24 (1.65, 6.39) | *     | 1.36 (0.32, 5.67)  | *   | n/a                  |      |                     |
|                           | 15-21 days: 2nd dose                   | *    | 0.57 (0.14, 2.35) | *     | 1.59 (0.38, 6.64)  | *   | n/a                  |      |                     |
|                           | 22-28 days: 2nd dose                   | 6    | 1.63 (0.69, 3.85) | *     | n/a                | *   | n/a                  |      |                     |
| <b>Pericarditis</b>       | Baseline                               | 57   | 1.00              | 107   | 1.00               | 11  | 1.00                 | 26   | 1.00                |
|                           | -28 to -1 days: 1st dose/positive test | 7    | 0.46 (0.21, 1.04) | 16    | 0.86 (0.50, 1.49)  | *   | 1.77 (0.48, 6.57)    | 5    | 2.08 (0.76, 5.66)   |
|                           | 0 day: 1st dose/positive test          | *    | n/a               | *     | n/a                | *   | n/a                  | *    | 21.59 (4.96, 94.00) |
|                           | 1-7 days: 1st dose/positive test       | *    | 0.58 (0.14, 2.44) | *     | 0.81 (0.29, 2.23)  | *   | n/a                  | *    | 2.67 (0.62, 11.49)  |
|                           | 8-14 days: 1st dose/positive test      | *    | 0.58 (0.14, 2.44) | *     | 0.43 (0.10, 1.76)  | *   | n/a                  | *    | n/a                 |
|                           | 15-21 days: 1st dose/positive test     | *    | n/a               | 6     | 1.38 (0.60, 3.21)  | *   | n/a                  | *    | n/a                 |
|                           | 22-28 days: 1st dose/positive test     | *    | 0.59 (0.14, 2.47) | *     | 0.98 (0.35, 2.70)  | *   | n/a                  | *    | n/a                 |
|                           | -28 to -1 days: 2nd dose               | 6    | 0.58 (0.24, 1.39) | 7     | 0.90 (0.40, 2.01)  | *   | n/a                  |      |                     |
|                           | 0 day: 2nd dose                        | *    | n/a               | *     | n/a                | *   | n/a                  |      |                     |
|                           | 1-7 days: 2nd dose                     | 6    | 2.25 (0.93, 5.48) | *     | 1.30 (0.40, 4.23)  | *   | n/a                  |      |                     |
|                           | 8-14 days: 2nd dose                    | 5    | 2.00 (0.77, 5.23) | *     | 1.43 (0.44, 4.65)  | *   | n/a                  |      |                     |
|                           | 15-21 days: 2nd dose                   | *    | 1.77 (0.62, 5.07) | *     | 1.08 (0.26, 4.50)  | *   | n/a                  |      |                     |
|                           | 22-28 days: 2nd dose                   | *    | 0.95 (0.22, 4.00) | *     | 1.18 (0.28, 4.97)  | *   | n/a                  |      |                     |
| <b>Cardiac arrhythmia</b> | Baseline                               | 5520 | 1.00              | 11531 | 1.00               | 924 | 1.00                 | 2290 | 1.00                |
|                           | -28 to -1 days: 1st dose/positive test | 1036 | 0.87 (0.81, 0.93) | 1787  | 0.90 (0.86, 0.95)  | 147 | 1.00 (0.84, 1.19)    | 283  | 1.24 (1.09, 1.40)   |

|                     |                                                |     |                   |     |                   |    |                   |     |                        |
|---------------------|------------------------------------------------|-----|-------------------|-----|-------------------|----|-------------------|-----|------------------------|
|                     | 0 day: 1st dose/positive test                  | 17  | 0.39 (0.24, 0.63) | 25  | 0.36 (0.25, 0.54) | 6  | 1.25 (0.56, 2.79) | 189 | 21.63 (18.62, 25.14)   |
|                     | 1-7 days: 1st dose/positive test               | 352 | 1.15 (1.03, 1.28) | 364 | 0.76 (0.69, 0.85) | 29 | 0.88 (0.61, 1.27) | 378 | 6.14 (5.50, 6.87)      |
|                     | 8-14 days: 1st dose/positive test              | 274 | 0.88 (0.77, 0.99) | 459 | 0.98 (0.89, 1.07) | 25 | 0.78 (0.53, 1.17) | 258 | 4.14 (3.63, 4.72)      |
|                     | 15-21 days: 1 <sup>st</sup> dose/positive test | 279 | 0.89 (0.79, 1.01) | 405 | 0.89 (0.81, 0.99) | 27 | 0.92 (0.63, 1.35) | 118 | 1.82 (1.51, 2.19)      |
|                     | 22-28 days: 1st dose/positive test             | 267 | 0.85 (0.75, 0.96) | 411 | 0.96 (0.87, 1.06) | 27 | 1.01 (0.69, 1.49) | 114 | 1.69 (1.40, 2.04)      |
|                     | -28 to -1 days: 2nd dose                       | 839 | 0.76 (0.71, 0.83) | 659 | 0.76 (0.70, 0.82) | 18 | 0.67 (0.42, 1.09) |     |                        |
|                     | 0 day: 2nd dose                                | 20  | 0.51 (0.33, 0.80) | 15  | 0.46 (0.27, 0.76) | *  | n/a               |     |                        |
|                     | 1-7 days: 2nd dose                             | 256 | 0.96 (0.84, 1.09) | 246 | 1.12 (0.98, 1.27) | 10 | 2.09 (1.10, 3.94) |     |                        |
|                     | 8-14 days: 2nd dose                            | 268 | 1.03 (0.91, 1.17) | 232 | 1.14 (1.00, 1.30) | 5  | 1.38 (0.57, 3.36) |     |                        |
|                     | 15-21 days: 2nd dose                           | 248 | 0.98 (0.86, 1.12) | 178 | 0.96 (0.83, 1.12) | *  | n/a               |     |                        |
|                     | 22-28 days: 2nd dose                           | 218 | 0.89 (0.78, 1.02) | 146 | 0.87 (0.74, 1.03) | *  | 1.39 (0.34, 5.62) |     |                        |
| <b>Age &gt;= 40</b> |                                                |     |                   |     |                   |    |                   |     |                        |
| <b>Myocarditis</b>  | Baseline                                       | 455 | 1.00              | 278 | 1.00              | 6  | 1.00              | 82  | 1.00                   |
|                     | -28 to -1 days: 1st dose/positive test         | 73  | 0.81 (0.62, 1.05) | 34  | 0.70 (0.48, 1.03) | *  | n/a               | 25  | 3.40 (2.12, 5.46)      |
|                     | 0 day: 1st dose/positive test                  | *   | 0.66 (0.16, 2.68) | *   | n/a               | *  | n/a               | 31  | 100.44 (64.84, 155.60) |
|                     | 1-7 days: 1st dose/positive test               | 33  | 1.49 (1.03, 2.17) | 13  | 0.91 (0.51, 1.62) | *  | n/a               | 58  | 26.08 (18.16, 37.44)   |
|                     | 8-14 days: 1st dose/positive test              | 33  | 1.38 (0.95, 2.01) | 12  | 0.84 (0.46, 1.54) | *  | n/a               | 36  | 15.61 (10.35, 23.54)   |
|                     | 15-21 days: 1 <sup>st</sup> dose/positive test | 26  | 1.08 (0.71, 1.63) | 16  | 1.11 (0.66, 1.88) | *  | n/a               | 15  | 6.27 (3.58, 11.00)     |
|                     | 22-28 days: 1st dose/positive test             | 29  | 1.19 (0.81, 1.77) | 20  | 1.49 (0.93, 2.40) | *  | n/a               | 8   | 3.20 (1.54, 6.67)      |
|                     | -28 to -1 days: 2nd dose                       | 53  | 0.69 (0.51, 0.94) | 41  | 0.91 (0.64, 1.29) | *  | n/a               |     |                        |
|                     | 0 day: 2nd dose                                | *   | 0.72 (0.18, 2.92) | *   | n/a               | *  | n/a               |     |                        |

|                           |                                        |        |                   |        |                   |     |                    |       |                      |
|---------------------------|----------------------------------------|--------|-------------------|--------|-------------------|-----|--------------------|-------|----------------------|
|                           | 1-7 days: 2nd dose                     | 11     | 0.58 (0.31, 1.06) | 9      | 0.73 (0.37, 1.44) | *   | n/a                |       |                      |
|                           | 8-14 days: 2nd dose                    | 17     | 0.92 (0.56, 1.50) | 13     | 1.04 (0.59, 1.83) | *   | n/a                |       |                      |
|                           | 15-21 days: 2nd dose                   | 17     | 0.95 (0.58, 1.56) | 12     | 0.99 (0.55, 1.78) | *   | n/a                |       |                      |
|                           | 22-28 days: 2nd dose                   | 18     | 1.04 (0.64, 1.68) | 12     | 1.01 (0.56, 1.83) | *   | n/a                |       |                      |
| <b>Pericarditis</b>       | Baseline                               | 524    | 1.00              | 307    | 1.00              | *   | 1.00               | 69    | 1.00                 |
|                           | -28 to -1 days: 1st dose/positive test | 57     | 0.59 (0.44, 0.79) | 26     | 0.60 (0.39, 0.90) | *   | 2.90 (0.18, 46.58) | 24    | 4.38 (2.68, 7.18)    |
|                           | 0 day: 1st dose/positive test          | *      | n/a               | *      | n/a               | *   | n/a                | 9     | 42.93 (20.99, 87.78) |
|                           | 1-7 days: 1st dose/positive test       | 17     | 0.62 (0.38, 1.01) | 7      | 0.56 (0.26, 1.20) | *   | n/a                | 9     | 6.15 (3.01, 12.54)   |
|                           | 8-14 days: 1st dose/positive test      | 32     | 1.10 (0.76, 1.59) | 7      | 0.52 (0.24, 1.11) | *   | n/a                | 9     | 5.82 (2.86, 11.85)   |
|                           | 15-21 days: 1st dose/positive test     | 22     | 0.71 (0.46, 1.09) | 13     | 0.94 (0.53, 1.67) | *   | n/a                | *     | 2.42 (0.88, 6.70)    |
|                           | 22-28 days: 1st dose/positive test     | 24     | 0.73 (0.48, 1.12) | 16     | 1.10 (0.66, 1.85) | *   | n/a                | *     | 1.12 (0.27, 4.58)    |
|                           | -28 to -1 days: 2nd dose               | 52     | 0.41 (0.30, 0.55) | 28     | 0.41 (0.28, 0.62) | *   | n/a                |       |                      |
|                           | 0 day: 2nd dose                        | *      | n/a               | *      | 1.07 (0.34, 3.35) | *   | n/a                |       |                      |
|                           | 1-7 days: 2nd dose                     | 31     | 1.00 (0.68, 1.45) | 9      | 0.48 (0.24, 0.93) | *   | n/a                |       |                      |
|                           | 8-14 days: 2nd dose                    | 24     | 0.78 (0.51, 1.19) | 13     | 0.71 (0.40, 1.24) | *   | n/a                |       |                      |
|                           | 15-21 days: 2nd dose                   | 32     | 1.05 (0.73, 1.53) | 19     | 1.02 (0.64, 1.64) | *   | n/a                |       |                      |
|                           | 22-28 days: 2nd dose                   | 13     | 0.45 (0.26, 0.79) | 24     | 1.33 (0.87, 2.03) | *   | n/a                |       |                      |
| <b>Cardiac arrhythmia</b> | Baseline                               | 112836 | 1.00              | 102437 | 1.00              | 297 | 1.00               | 12829 | 1.00                 |
|                           | -28 to -1 days: 1st dose/positive test | 16526  | 0.77 (0.76, 0.78) | 10980  | 0.69 (0.68, 0.71) | 37  | 0.64 (0.46, 0.91)  | 6335  | 5.49 (5.32, 5.67)    |
|                           | 0 day: 1st dose/positive test          | 272    | 0.33 (0.29, 0.37) | 207    | 0.32 (0.28, 0.37) | *   | 1.50 (0.48, 4.70)  | 3658  | 78.56 (75.62, 81.61) |
|                           | 1-7 days: 1st dose/positive test       | 5521   | 0.93 (0.91, 0.96) | 3594   | 0.79 (0.76, 0.81) | 9   | 0.66 (0.34, 1.27)  | 4215  | 12.72 (12.27, 13.19) |
|                           | 8-14 days: 1st dose/positive test      | 5707   | 0.93 (0.90, 0.96) | 4378   | 0.91 (0.88, 0.94) | 15  | 1.13 (0.67, 1.90)  | 2385  | 7.00 (6.69, 7.32)    |

|                                                   |       |                   |       |                   |    |                   |     |                   |
|---------------------------------------------------|-------|-------------------|-------|-------------------|----|-------------------|-----|-------------------|
| 15-21 days:<br>1 <sup>st</sup> dose/positive test | 5964  | 0.95 (0.93, 0.98) | 4566  | 0.92 (0.90, 0.95) | 16 | 1.23 (0.74, 2.05) | 848 | 2.38 (2.22, 2.56) |
| 22-28 days:<br>1st dose/positive test             | 5861  | 0.92 (0.90, 0.95) | 4182  | 0.88 (0.85, 0.91) | 8  | 0.64 (0.32, 1.30) | 624 | 1.66 (1.54, 1.80) |
| -28 to -1 days: 2nd<br>dose                       | 17756 | 0.75 (0.74, 0.77) | 14351 | 0.75 (0.73, 0.76) | 20 | 0.62 (0.39, 0.98) |     |                   |
| 0 day: 2nd dose                                   | 245   | 0.29 (0.25, 0.32) | 242   | 0.32 (0.28, 0.36) | *  | n/a               |     |                   |
| 1-7 days: 2nd dose                                | 4980  | 0.84 (0.82, 0.86) | 4491  | 0.84 (0.81, 0.86) | 12 | 1.76 (0.98, 3.16) |     |                   |
| 8-14 days: 2nd dose                               | 5663  | 0.97 (0.94, 0.99) | 5056  | 0.94 (0.91, 0.96) | 8  | 1.34 (0.66, 2.72) |     |                   |
| 15-21 days: 2nd dose                              | 5771  | 1.01 (0.98, 1.03) | 5317  | 0.99 (0.96, 1.02) | 5  | 1.02 (0.42, 2.47) |     |                   |
| 22-28 days: 2nd dose                              | 5615  | 1.00 (0.98, 1.03) | 5281  | 0.99 (0.96, 1.02) | 5  | 1.37 (0.56, 3.35) |     |                   |

**Supplementary table 3b: Incidence rate ratios (IRR 95% CI) by age groups (16-29; 30-39; 40+) for the outcomes in pre-defined risk periods immediately before and after exposure to vaccination and before and after a positive SARS-CoV-2 test result, adjusted for calendar time from December 1 2020 to August 24 2021 (cells with < 5 are suppressed).**

|                    |                                           | ChAdOx1 vaccine |                   | BNT162b2 mRNA vaccine |                   | mRNA-1273 vaccine |                    | Positive SARS-CoV-2 test |                   |
|--------------------|-------------------------------------------|-----------------|-------------------|-----------------------|-------------------|-------------------|--------------------|--------------------------|-------------------|
|                    | Time period                               | events          | IRR (95% CI)      | events                | IRR (95% CI)      | events            | IRR (95% CI)       | events                   | IRR (95% CI)      |
| <b>Age 16-29</b>   |                                           |                 |                   |                       |                   |                   |                    |                          |                   |
| <b>Myocarditis</b> | Baseline                                  | 43              | 1.00              | 61                    | 1.00              | 9                 | 1.00               | 19                       | 1.00              |
|                    | -28 to -1 days: 1st<br>dose/positive test | 5               | 0.52 (0.19, 1.38) | 8                     | 0.82 (0.38, 1.78) | *                 | 1.27 (0.26, 6.33)  | *                        | 1.73 (0.57, 5.30) |
|                    | 0 day: 1st<br>dose/positive test          | *               | n/a               | *                     | n/a               | *                 | n/a                | *                        | n/a               |
|                    | 1-28 days: 1st<br>dose/positive test      | 9               | 1.01 (0.46, 2.22) | 11                    | 1.11 (0.56, 2.21) | 6                 | 5.20 (1.70, 15.94) | 7                        | 2.83 (1.14, 7.03) |
|                    | -28 to -1 days: 2nd<br>dose               | *               | n/a               | *                     | 0.87 (0.26, 2.96) | *                 | n/a                |                          |                   |
|                    | 0 day: 2nd dose                           | *               | n/a               | *                     | n/a               | *                 | n/a                |                          |                   |

|                           |                                        |      |                   |      |                   |     |                       |      |                      |
|---------------------------|----------------------------------------|------|-------------------|------|-------------------|-----|-----------------------|------|----------------------|
|                           | 1-28 days: 2nd dose                    | 10   | 1.54 (0.70, 3.37) | 8    | 2.88 (1.24, 6.72) | *   | 74.39 (5.28, 1048.75) |      |                      |
| <b>Pericarditis</b>       | Baseline                               | 29   | 1.00              | 58   | 1.00              | 5   | 1.00                  | 19   | 1.00                 |
|                           | -28 to -1 days: 1st dose/positive test | *    | 0.41 (0.12, 1.42) | 8    | 0.88 (0.40, 1.93) | *   | n/a                   | 5    | 2.58 (0.90, 7.38)    |
|                           | 0 day: 1st dose/positive test          | *    | n/a               | *    | n/a               | *   | n/a                   | *    | n/a                  |
|                           | 1-28 days: 1st dose/positive test      | *    | 0.41 (0.12, 1.42) | 6    | 0.82 (0.34, 1.98) | *   | n/a                   | *    | n/a                  |
|                           | -28 to -1 days: 2nd dose               | *    | 0.38 (0.09, 1.70) | *    | 1.00 (0.29, 3.49) | *   | n/a                   |      |                      |
|                           | 0 day: 2nd dose                        | *    | n/a               | *    | n/a               | *   | n/a                   |      |                      |
|                           | 1-28 days: 2nd dose                    | 9    | 2.20 (0.92, 5.25) | 6    | 1.81 (0.69, 4.74) | *   | n/a                   |      |                      |
| <b>Cardiac arrhythmia</b> | Baseline                               | 2211 | 1.00              | 5832 | 1.00              | 479 | 1.00                  | 1146 | 1.00                 |
|                           | -28 to -1 days: 1st dose/positive test | 420  | 0.86 (0.77, 0.96) | 827  | 0.88 (0.82, 0.95) | 66  | 0.94 (0.73, 1.22)     | 148  | 1.27 (1.07, 1.52)    |
|                           | 0 day: 1st dose/positive test          | 11   | 0.62 (0.34, 1.12) | 13   | 0.39 (0.23, 0.68) | *   | 1.29 (0.41, 4.01)     | 77   | 17.60 (13.94, 22.22) |
|                           | 1-28 days: 1st dose/positive test      | 498  | 0.99 (0.89, 1.09) | 810  | 0.94 (0.87, 1.02) | 56  | 1.02 (0.77, 1.36)     | 333  | 2.66 (2.34, 3.01)    |
|                           | -28 to -1 days: 2nd dose               | 365  | 0.84 (0.75, 0.95) | 263  | 0.80 (0.70, 0.91) | *   | 0.78 (0.28, 2.20)     |      |                      |
|                           | 0 day: 2nd dose                        | 11   | 0.72 (0.40, 1.31) | 6    | 0.46 (0.21, 1.04) | *   | n/a                   |      |                      |
|                           | 1-28 days: 2nd dose                    | 416  | 1.02 (0.92, 1.14) | 315  | 0.99 (0.87, 1.11) | *   | 0.64 (0.15, 2.64)     |      |                      |
| <b>Age 30-39</b>          |                                        |      |                   |      |                   |     |                       |      |                      |
| <b>Myocarditis</b>        | Baseline                               | 52   | 1.00              | 59   | 1.00              | 7   | 1.00                  | 18   | 1.00                 |
|                           | -28 to -1 days: 1st dose/positive test | *    | 0.24 (0.07, 0.80) | 7    | 1.15 (0.50, 2.65) | *   | n/a                   | *    | 1.76 (0.49, 6.25)    |



|                           |                                        |        |                   |        |                   |     |                    |       |                       |
|---------------------------|----------------------------------------|--------|-------------------|--------|-------------------|-----|--------------------|-------|-----------------------|
| <b>Myocarditis</b>        | Baseline                               | 455    | 1.00              | 278    | 1.00              | 6   | 1.00               | 82    | 1.00                  |
|                           | -28 to -1 days: 1st dose/positive test | 73     | 0.76 (0.58, 1.00) | 34     | 0.68 (0.47, 1.00) | *   | n/a                | 25    | 3.22 (2.02, 5.15)     |
|                           | 0 day: 1st dose/positive test          | *      | 0.66 (0.16, 2.67) | *      | n/a               | *   | n/a                | 31    | 94.81 (61.39, 146.42) |
|                           | 1-28 days: 1st dose/positive test      | 121    | 1.33 (1.06, 1.67) | 61     | 1.12 (0.83, 1.52) | *   | n/a                | 117   | 12.18 (9.01, 16.46)   |
|                           | -28 to -1 days: 2nd dose               | 53     | 0.70 (0.51, 0.95) | 41     | 0.93 (0.65, 1.32) | *   | n/a                |       |                       |
|                           | 0 day: 2nd dose                        | *      | 0.73 (0.18, 2.95) | 0      | n/a               | *   | n/a                |       |                       |
|                           | 1-28 days: 2nd dose                    | 63     | 0.87 (0.65, 1.15) | 46     | 0.96 (0.69, 1.34) | *   | 2.23 (0.23, 21.46) |       |                       |
|                           |                                        |        |                   |        |                   |     |                    |       |                       |
| <b>Pericarditis</b>       | Baseline                               | 524    | 1.00              | 307    | 1.00              | *   | 1.00               | 69    | 1.00                  |
|                           | -28 to -1 days: 1st dose/positive test | 57     | 0.59 (0.44, 0.78) | 26     | 0.60 (0.39, 0.90) | *   | n/a                | 24    | 4.30 (2.63, 7.03)     |
|                           | 0 day: 1st dose/positive test          | *      | n/a               | *      | n/a               | *   | n/a                | 9     | 42.16 (20.65, 86.07)  |
|                           | 1-28 days: 1st dose/positive test      | 95     | 0.79 (0.62, 1.00) | 43     | 0.80 (0.57, 1.12) | *   | n/a                | 24    | 3.72 (2.30, 6.00)     |
|                           | -28 to -1 days: 2nd dose               | 52     | 0.40 (0.30, 0.55) | 28     | 0.41 (0.28, 0.61) | *   | n/a                |       |                       |
|                           | 0 day: 2nd dose                        | *      | n/a               | *      | 1.07 (0.34, 3.35) | *   | n/a                |       |                       |
|                           | 1-28 days: 2nd dose                    | 100    | 0.82 (0.65, 1.04) | 65     | 0.88 (0.66, 1.16) | *   | n/a                |       |                       |
|                           |                                        |        |                   |        |                   |     |                    |       |                       |
| <b>Cardiac arrhythmia</b> | Baseline                               | 112836 | 1.00              | 102437 | 1.00              | 297 | 1.00               | 12829 | 1.00                  |
|                           | -28 to -1 days: 1st dose/positive test | 16526  | 0.75 (0.74, 0.76) | 10980  | 0.68 (0.67, 0.70) | 37  | 0.64 (0.46, 0.91)  | 6335  | 5.35 (5.18, 5.52)     |
|                           | 0 day: 1st dose/positive test          | 272    | 0.33 (0.29, 0.37) | 207    | 0.32 (0.28, 0.37) | *   | 1.50 (0.48, 4.69)  | 3658  | 76.38 (73.54, 79.34)  |
|                           | 1-28 days: 1st dose/positive test      | 23053  | 0.94 (0.93, 0.96) | 16720  | 0.88 (0.87, 0.90) | 48  | 0.91 (0.67, 1.24)  | 8072  | 5.71 (5.54, 5.87)     |
|                           | -28 to -1 days: 2nd dose               | 17756  | 0.76 (0.74, 0.77) | 14351  | 0.75 (0.74, 0.77) | 20  | 0.62 (0.39, 0.98)  |       |                       |

|  |                     |       |                   |       |                   |    |                   |  |  |
|--|---------------------|-------|-------------------|-------|-------------------|----|-------------------|--|--|
|  | 0 day: 2nd dose     | 245   | 0.29 (0.25, 0.32) | 242   | 0.32 (0.28, 0.36) | *  | n/a               |  |  |
|  | 1-28 days: 2nd dose | 22029 | 0.95 (0.94, 0.97) | 20145 | 0.94 (0.93, 0.96) | 30 | 1.40 (0.95, 2.07) |  |  |

**Supplementary table 4: Incidence rate ratios (IRR 95% CI) for the outcomes in pre-defined risk periods immediately before and after exposure to vaccination adjusted for calendar time from December 1 2020 to August 24 2021 (cells with < 5 are suppressed), including only people who did not have a SARS-CoV-2 positive test. Model for pericarditis does not converge with the mRNA-1273 vaccine.**

|                    |                                                | ChAdOx1 vaccine |                   | BNT162b2 mRNA vaccine |                   | mRNA-1273 vaccine |                     |
|--------------------|------------------------------------------------|-----------------|-------------------|-----------------------|-------------------|-------------------|---------------------|
|                    | Time period                                    | events          | IRR (95% CI)      | events                | IRR (95% CI)      | events            | IRR (95% CI)        |
| <b>Myocarditis</b> | Baseline                                       | 387             | 1.00              | 314                   | 1.00              | 18                | 1.00                |
|                    | -28 to -1 days: 1st dose/positive test         | 62              | 0.82 (0.62, 1.09) | 42                    | 0.84 (0.60, 1.17) | *                 | 0.61 (0.14, 2.63)   |
|                    | 0 day: 1st dose/positive test                  | *               | 0.69 (0.17, 2.80) | *                     | 1.53 (0.49, 4.78) | *                 | n/a                 |
|                    | 1-7 days: 1st dose/positive test               | 38              | 1.91 (1.35, 2.70) | 22                    | 1.58 (1.02, 2.44) | 5                 | 6.30 (2.32, 17.13)  |
|                    | 8-14 days: 1st dose/positive test              | 24              | 1.15 (0.75, 1.76) | 18                    | 1.31 (0.81, 2.12) | *                 | n/a                 |
|                    | 15-21 days: 1 <sup>st</sup> dose/positive test | 22              | 1.02 (0.65, 1.58) | 17                    | 1.22 (0.75, 2.01) | *                 | n/a                 |
|                    | 22-28 days: 1st dose/positive test             | 23              | 1.04 (0.67, 1.60) | 17                    | 1.28 (0.78, 2.10) | *                 | n/a                 |
|                    | -28 to -1 days: 2nd dose                       | 53              | 0.71 (0.52, 0.96) | 44                    | 1.02 (0.73, 1.42) | *                 | 1.90 (0.39, 9.31)   |
|                    | 0 day: 2nd dose                                | *               | 0.74 (0.18, 2.99) | *                     | n/a               | *                 | n/a                 |
|                    | 1-7 days: 2nd dose                             | 11              | 0.59 (0.32, 1.08) | 20                    | 1.75 (1.10, 2.79) | *                 | 19.86 (5.52, 71.47) |
|                    | 8-14 days: 2nd dose                            | 26              | 1.41 (0.93, 2.12) | 15                    | 1.34 (0.79, 2.27) | *                 | n/a                 |
|                    | 15-21 days: 2nd dose                           | 18              | 0.99 (0.61, 1.60) | 13                    | 1.20 (0.68, 2.12) | *                 | n/a                 |
|                    | 22-28 days: 2nd dose                           | 18              | 0.99 (0.61, 1.60) | 11                    | 1.04 (0.57, 1.93) | *                 | n/a                 |
|                    |                                                |                 |                   |                       |                   |                   |                     |
|                    | 1-28 days: 1st dose/positive test              | 107             | 1.27 (1.00, 1.60) | 74                    | 1.34 (1.03, 1.74) | 7                 | 2.37 (0.98, 5.75)   |



|                           |                                                |        |                   |        |                   |      |                    |
|---------------------------|------------------------------------------------|--------|-------------------|--------|-------------------|------|--------------------|
|                           | 1-28 days: 2nd dose                            | 73     | 1.00 (0.76, 1.30) | 59     | 1.35 (1.00, 1.82) | *    | 8.70 (2.35, 32.11) |
|                           |                                                |        |                   |        |                   |      |                    |
| <b>Pericarditis</b>       | Baseline                                       | 501    | 1.00              | 376    | 1.00              | -    | -                  |
|                           | -28 to -1 days: 1st dose/positive test         | 57     | 0.56 (0.42, 0.75) | 38     | 0.63 (0.45, 0.89) | -    | -                  |
|                           | 0 day: 1st dose/positive test                  | *      | n/a               | *      | 0.80 (0.20, 3.23) | -    | -                  |
|                           | 1-7 days: 1st dose/positive test               | 14     | 0.49 (0.29, 0.84) | 9      | 0.52 (0.27, 1.02) | -    | -                  |
|                           | 8-14 days: 1st dose/positive test              | 29     | 0.96 (0.65, 1.41) | 6      | 0.35 (0.16, 0.79) | -    | -                  |
|                           | 15-21 days: 1 <sup>st</sup> dose/positive test | 19     | 0.59 (0.37, 0.94) | 16     | 0.94 (0.57, 1.57) | -    | -                  |
|                           | 22-28 days: 1st dose/positive test             | 24     | 0.72 (0.48, 1.10) | 16     | 0.90 (0.54, 1.49) | -    | -                  |
|                           | -28 to -1 days: 2nd dose                       | 51     | 0.40 (0.29, 0.54) | 31     | 0.42 (0.29, 0.61) | -    | -                  |
|                           | 0 day: 2nd dose                                | *      | n/a               | *      | 0.65 (0.16, 2.64) | -    | -                  |
|                           | 1-7 days: 2nd dose                             | 35     | 1.13 (0.80, 1.62) | 12     | 0.58 (0.33, 1.04) | -    | -                  |
|                           | 8-14 days: 2nd dose                            | 23     | 0.77 (0.50, 1.18) | 14     | 0.70 (0.41, 1.21) | -    | -                  |
|                           | 15-21 days: 2nd dose                           | 33     | 1.12 (0.78, 1.60) | 21     | 1.06 (0.68, 1.67) | -    | -                  |
|                           | 22-28 days: 2nd dose                           | 13     | 0.46 (0.26, 0.80) | 25     | 1.32 (0.87, 1.99) | -    | -                  |
|                           |                                                |        |                   |        |                   |      |                    |
|                           | 1-28 days: 1st dose/positive test              | 86     | 0.69 (0.54, 0.88) | 47     | 0.68 (0.50, 0.93) | -    | -                  |
|                           | 1-28 days: 2nd dose                            | 104    | 0.87 (0.69, 1.09) | 72     | 0.90 (0.69, 1.18) | -    | -                  |
|                           |                                                |        |                   |        |                   |      |                    |
| <b>Cardiac arrhythmia</b> | Baseline                                       | 101126 | 1.00              | 105775 | 1.00              | 1012 | 1.00               |
|                           | -28 to -1 days: 1st dose/positive test         | 15105  | 0.80 (0.79, 0.82) | 11577  | 0.74 (0.72, 0.75) | 167  | 0.92 (0.78, 1.08)  |
|                           | 0 day: 1st dose/positive test                  | 244    | 0.33 (0.29, 0.37) | 202    | 0.32 (0.28, 0.37) | 8    | 1.30 (0.65, 2.61)  |
|                           | 1-7 days: 1st dose/positive test               | 4945   | 0.92 (0.90, 0.95) | 3276   | 0.75 (0.72, 0.77) | 31   | 0.74 (0.52, 1.06)  |
|                           | 8-14 days: 1st dose/positive test              | 5087   | 0.91 (0.89, 0.94) | 3999   | 0.88 (0.86, 0.91) | 38   | 0.95 (0.69, 1.32)  |
|                           | 15-21 days: 1 <sup>st</sup> dose/positive test | 5442   | 0.95 (0.92, 0.97) | 4286   | 0.91 (0.88, 0.94) | 39   | 1.04 (0.75, 1.43)  |
|                           | 22-28 days: 1st dose/positive test             | 5509   | 0.93 (0.90, 0.95) | 4117   | 0.89 (0.86, 0.92) | 32   | 0.92 (0.65, 1.31)  |
|                           | -28 to -1 days: 2nd dose                       | 17321  | 0.76 (0.74, 0.77) | 14319  | 0.75 (0.73, 0.76) | 35   | 0.65 (0.46, 0.92)  |
|                           | 0 day: 2nd dose                                | 249    | 0.30 (0.26, 0.34) | 242    | 0.32 (0.28, 0.36) | *    | n/a                |

|                                   |       |                   |       |                   |     |                   |
|-----------------------------------|-------|-------------------|-------|-------------------|-----|-------------------|
| 1-7 days: 2nd dose                | 4837  | 0.84 (0.81, 0.86) | 4479  | 0.84 (0.82, 0.87) | 22  | 2.06 (1.34, 3.17) |
| 8-14 days: 2nd dose               | 5515  | 0.97 (0.94, 0.99) | 5047  | 0.94 (0.92, 0.97) | 13  | 1.48 (0.85, 2.59) |
| 15-21 days: 2nd dose              | 5606  | 1.00 (0.97, 1.03) | 5240  | 0.98 (0.95, 1.01) | 6   | 0.90 (0.40, 2.01) |
| 22-28 days: 2nd dose              | 5456  | 1.00 (0.97, 1.03) | 5201  | 0.98 (0.96, 1.01) | 7   | 1.52 (0.72, 3.22) |
|                                   |       |                   |       |                   |     |                   |
| 1-28 days: 1st dose/positive test | 20983 | 0.93 (0.91, 0.94) | 15678 | 0.86 (0.85, 0.88) | 140 | 0.90 (0.76, 1.08) |
| 1-28 days: 2nd dose               | 21414 | 0.95 (0.93, 0.96) | 19967 | 0.94 (0.93, 0.96) | 48  | 1.56 (1.15, 2.12) |

**Supplementary table 5: Incidence rate ratios (IRR 95% CI) for the outcomes in 1-28 days risk periods immediately before and after exposure to vaccination, adjusted for calendar time from December 1 2020 to August 24 2021 (cells with < 5 are suppressed), including only people who had a SARS-CoV-2 positive test result prior vaccination. Numbers of events in those vaccinated with mRNA-1273 vaccine were too small for meaningful results.**

|                     | Time period                            | ChAdOx1 vaccine |                   | BNT162b2 mRNA vaccine |                   | Positive SARS-CoV-2 test |                      |
|---------------------|----------------------------------------|-----------------|-------------------|-----------------------|-------------------|--------------------------|----------------------|
|                     |                                        | events          | IRR (95% CI)      | events                | IRR (95% CI)      | events                   | IRR (95% CI)         |
| <b>Myocarditis</b>  | Baseline                               | 145             | 1.00              | 66                    | 1.00              | 95                       | 1.00                 |
|                     | -28 to -1 days: 1st dose/positive test | 19              | 0.52 (0.31, 0.88) | 7                     | 0.49 (0.21, 1.14) | 25                       | 1.63 (0.96, 2.78)    |
|                     | 0 day: 1st dose/positive test          | *               | n/a               | *                     | n/a               | 23                       | 38.14 (22.32, 65.18) |
|                     | 1-28 days: 1st dose/positive test      | 18              | 1.09 (0.63, 1.91) | 7                     | 0.96 (0.42, 2.20) | 106                      | 6.59 (4.54, 9.56)    |
|                     | -28 to -1 days: 2nd dose               | *               | 0.35 (0.12, 0.99) | *                     | 0.90 (0.31, 2.63) |                          |                      |
|                     | 0 day: 2nd dose                        | *               | n/a               | *                     | n/a               |                          |                      |
|                     | 1-28 days: 2nd dose                    | 9               | 0.91 (0.43, 1.94) | *                     | 0.52 (0.12, 2.23) |                          |                      |
| <b>Pericarditis</b> | Baseline                               | 72              | 1.00              | 32                    | 1.00              | 79                       | 1.00                 |
|                     | -28 to -1 days: 1st dose/positive test | 7               | 0.50 (0.22, 1.14) | *                     | 0.54 (0.16, 1.81) | 24                       | 3.38 (1.80, 6.34)    |
|                     | 0 day: 1st dose/positive test          | *               | n/a               | *                     | n/a               | 6                        | 19.96 (7.89, 50.45)  |
|                     | 1-28 days: 1st dose/positive test      | 11              | 1.02 (0.50, 2.07) | 7                     | 1.43 (0.61, 3.36) | 19                       | 2.12 (1.15, 3.91)    |
|                     | -28 to -1 days: 2nd dose               | *               | 0.31 (0.09, 1.03) | *                     | 1.52 (0.49, 4.70) |                          |                      |

|                           |                                        |       |                   |      |                   |       |                      |
|---------------------------|----------------------------------------|-------|-------------------|------|-------------------|-------|----------------------|
|                           | 0 day: 2nd dose                        | *     | n/a               | *    | n/a               |       |                      |
|                           | 1-28 days: 2nd dose                    | 11    | 1.10 (0.54, 2.24) | *    | n/a               |       |                      |
| <b>Cardiac arrhythmia</b> | Baseline                               | 14933 | 1.00              | 5895 | 1.00              | 10928 | 1.00                 |
|                           | -28 to -1 days: 1st dose/positive test | 2025  | 0.55 (0.52, 0.58) | 883  | 0.61 (0.56, 0.66) | 4120  | 2.78 (2.64, 2.91)    |
|                           | 0 day: 1st dose/positive test          | 24    | 0.29 (0.19, 0.43) | 15   | 0.41 (0.25, 0.68) | 2402  | 39.09 (37.03, 41.25) |
|                           | 1-28 days: 1st dose/positive test      | 1559  | 0.78 (0.74, 0.83) | 694  | 0.81 (0.74, 0.88) | 6761  | 4.05 (3.89, 4.22)    |
|                           | -28 to -1 days: 2nd dose               | 1008  | 0.70 (0.65, 0.75) | 462  | 0.78 (0.71, 0.87) |       |                      |
|                           | 0 day: 2nd dose                        | 11    | 0.21 (0.12, 0.39) | 6    | 0.27 (0.12, 0.61) |       |                      |
|                           | 1-28 days: 2nd dose                    | 1269  | 0.95 (0.89, 1.01) | 580  | 1.02 (0.93, 1.12) |       |                      |

**Supplementary table 6: Incidence rate ratios (IRR 95% CI) for subgroups of arrhythmia in pre-defined risk periods immediately before and after exposure to vaccination and before and after a Positive SARS-CoV-2 test result, adjusted for calendar time from December 1 2020 until August 24 2021, 2021 (cells with < 5 are suppressed).**

|                                        | Time period                            | ChAdOx1 vaccine |                   | BNT162b2 mRNA vaccine |                   | mRNA-1273 vaccine |                   | Positive SARS-CoV-2 test |                      |
|----------------------------------------|----------------------------------------|-----------------|-------------------|-----------------------|-------------------|-------------------|-------------------|--------------------------|----------------------|
|                                        |                                        | events          | IRR (95% CI)      | events                | IRR (95% CI)      | events            | IRR (95% CI)      | events                   | IRR (95% CI)         |
| <b>Atrial fibrillation and flutter</b> | Baseline                               | 69651           | 1.00              | 69639                 | 1.00              | 143               | 1.00              | 7641                     | 1.00                 |
|                                        | -28 to -1 days: 1st dose/positive test | 9620            | 0.74 (0.72, 0.75) | 7344                  | 0.68 (0.67, 0.70) | 29                | 1.17 (0.78, 1.75) | 4335                     | 6.32 (6.08, 6.58)    |
|                                        | 0 day: 1st dose/positive test          | 157             | 0.31 (0.27, 0.36) | 129                   | 0.30 (0.25, 0.35) | *                 | 2.36 (0.58, 9.53) | 2327                     | 83.39 (79.47, 87.51) |
|                                        | 1-7 days: 1st dose/positive test       | 3249            | 0.89 (0.86, 0.93) | 2474                  | 0.79 (0.76, 0.83) | *                 | 0.69 (0.26, 1.87) | 2412                     | 12.17 (11.61, 12.76) |
|                                        | 8-14 days: 1st dose/positive test      | 3465            | 0.92 (0.89, 0.95) | 3003                  | 0.92 (0.89, 0.96) | 6                 | 1.08 (0.48, 2.45) | 1203                     | 5.92 (5.56, 6.29)    |
|                                        | 15-21 days: 1st dose/positive test     | 3565            | 0.93 (0.90, 0.96) | 3061                  | 0.91 (0.88, 0.95) | 11                | 2.06 (1.11, 3.82) | 464                      | 2.18 (1.99, 2.40)    |
|                                        | 22-28 days: 1st dose/positive test     | 3579            | 0.92 (0.89, 0.95) | 2806                  | 0.88 (0.84, 0.91) | 5                 | 0.85 (0.31, 2.30) | 341                      | 1.52 (1.36, 1.70)    |
|                                        | -28 to -1 days: 2nd dose               | 10507           | 0.72 (0.70, 0.74) | 9401                  | 0.73 (0.71, 0.74) | 8                 | 0.83 (0.40, 1.73) |                          |                      |



|                                 |                                        |                                   |                   |                   |                   |                   |                    |                   |                      |                   |
|---------------------------------|----------------------------------------|-----------------------------------|-------------------|-------------------|-------------------|-------------------|--------------------|-------------------|----------------------|-------------------|
|                                 | 1-28 days: 1st dose/positive test      | 7133                              | 0.94 (0.91, 0.97) | 5352              | 0.86 (0.83, 0.89) | 15                | 0.73 (0.42, 1.25)  | 2290              | 4.65 (4.42, 4.90)    |                   |
|                                 | 1-28 days: 2nd dose                    | 6832                              | 0.94 (0.92, 0.97) | 6678              | 0.94 (0.91, 0.97) | *                 | 0.87 (0.31, 2.41)  |                   |                      |                   |
|                                 |                                        |                                   |                   |                   |                   |                   |                    |                   |                      |                   |
| <b>Ventricular tachycardia</b>  | Baseline                               | 2655                              | 1.00              | 2184              | 1.00              | 12                | 1.00               | 344               | 1.00                 |                   |
|                                 | -28 to -1 days: 1st dose/positive test | 419                               | 0.83 (0.74, 0.93) | 225               | 0.69 (0.60, 0.80) | *                 | 1.37 (0.38, 4.91)  | 120               | 4.03 (3.24, 5.01)    |                   |
|                                 | 0 day: 1st dose/positive test          | *                                 | 0.10 (0.02, 0.40) | 6                 | 0.45 (0.20, 1.01) | *                 | n/a                | 50                | 40.91 (30.22, 55.39) |                   |
|                                 | 1-7 days: 1st dose/positive test       | 133                               | 0.92 (0.77, 1.11) | 72                | 0.76 (0.59, 0.96) | *                 | n/a                | 42                | 4.84 (3.50, 6.71)    |                   |
|                                 | 8-14 days:1st dose/positive test       | 133                               | 0.89 (0.75, 1.07) | 92                | 0.92 (0.74, 1.14) | *                 | 4.08 (0.90, 18.52) | 16                | 1.81 (1.09, 3.00)    |                   |
|                                 | 15-21 days: 1st dose/positive test     | 177                               | 1.15 (0.98, 1.35) | 94                | 0.92 (0.74, 1.14) | *                 | n/a                | 23                | 2.53 (1.65, 3.87)    |                   |
|                                 | 22-28 days: 1st dose/positive test     | 152                               | 0.97 (0.82, 1.15) | 111               | 1.06 (0.87, 1.29) | *                 | n/a                | 14                | 1.47 (0.86, 2.52)    |                   |
|                                 | -28 to -1 days: 2nd dose               | 445                               | 0.74 (0.67, 0.83) | 282               | 0.67 (0.58, 0.76) | *                 | n/a                |                   |                      |                   |
|                                 | 0 day: 2nd dose                        | 7                                 | 0.32 (0.15, 0.68) | *                 | 0.12 (0.03, 0.49) | *                 | n/a                |                   |                      |                   |
|                                 | 1-7 days: 2nd dose                     | 119                               | 0.80 (0.66, 0.97) | 109               | 0.96 (0.78, 1.16) | *                 | n/a                |                   |                      |                   |
|                                 | 8-14 days: 2nd dose                    | 139                               | 0.96 (0.80, 1.14) | 119               | 1.03 (0.85, 1.25) | *                 | n/a                |                   |                      |                   |
|                                 | 15-21 days: 2nd dose                   | 150                               | 1.06 (0.89, 1.25) | 106               | 0.94 (0.77, 1.14) | *                 | n/a                |                   |                      |                   |
|                                 | 22-28 days: 2nd dose                   | 155                               | 1.13 (0.96, 1.34) | 103               | 0.93 (0.76, 1.14) | *                 | n/a                |                   |                      |                   |
|                                 |                                        |                                   |                   |                   |                   |                   |                    |                   |                      |                   |
|                                 |                                        | 1-28 days: 1st dose/positive test | 595               | 0.99 (0.89, 1.09) | 369               | 0.92 (0.82, 1.04) | *                  | 2.11 (0.67, 6.66) | 95                   | 2.64 (2.10, 3.34) |
|                                 | 1-28 days: 2nd dose                    | 563                               | 0.98 (0.89, 1.08) | 437               | 0.97 (0.87, 1.08) | *                 | n/a                |                   |                      |                   |
|                                 |                                        |                                   |                   |                   |                   |                   |                    |                   |                      |                   |
| <b>Ventricular fibrillation</b> | Baseline                               | 1061                              | 1.00              | 721               | 1.00              | 7                 | 1.00               | 103               | 1.00                 |                   |
|                                 | -28 to -1 days: 1st dose/positive test | 150                               | 0.69 (0.57, 0.83) | 73                | 0.65 (0.50, 0.84) | *                 | n/a                | 43                | 5.02 (3.45, 7.30)    |                   |



|  |                                    |      |                   |      |                   |     |                   |      |                   |
|--|------------------------------------|------|-------------------|------|-------------------|-----|-------------------|------|-------------------|
|  | 22-28 days: 1st dose/positive test | 2119 | 0.90 (0.86, 0.94) | 1427 | 0.86 (0.81, 0.90) | 28  | 0.86 (0.58, 1.28) | 398  | 1.87 (1.69, 2.07) |
|  | -28 to -1 days: 2nd dose           | 6734 | 0.79 (0.77, 0.81) | 4510 | 0.77 (0.75, 0.80) | 30  | 0.67 (0.46, 0.97) |      |                   |
|  | 0 day: 2nd dose                    | 85   | 0.27 (0.22, 0.34) | 70   | 0.31 (0.24, 0.39) | *   | n/a               |      |                   |
|  | 1-7 days: 2nd dose                 | 1887 | 0.88 (0.84, 0.92) | 1401 | 0.88 (0.84, 0.93) | 21  | 2.32 (1.49, 3.62) |      |                   |
|  | 8-14 days: 2nd dose                | 2027 | 0.95 (0.91, 1.00) | 1540 | 0.97 (0.92, 1.02) | 11  | 1.50 (0.82, 2.74) |      |                   |
|  | 15-21 days: 2nd dose               | 2130 | 1.03 (0.98, 1.07) | 1519 | 0.97 (0.92, 1.02) | 5   | 0.90 (0.37, 2.19) |      |                   |
|  | 22-28 days: 2nd dose               | 2025 | 1.00 (0.96, 1.05) | 1487 | 0.97 (0.92, 1.02) | 5   | 1.32 (0.54, 3.20) |      |                   |
|  |                                    |      |                   |      |                   |     |                   |      |                   |
|  | 1-28 days: 1st dose/positive test  | 8601 | 0.95 (0.92, 0.97) | 5616 | 0.84 (0.82, 0.87) | 120 | 0.82 (0.67, 0.99) | 3674 | 4.60 (4.42, 4.79) |
|  | 1-28 days: 2nd dose                | 8069 | 0.96 (0.94, 0.99) | 5947 | 0.95 (0.92, 0.98) | 42  | 1.64 (1.18, 2.27) |      |                   |

**Supplementary Table 7: Incidence rate ratios (IRR 95% CI) for celiac disease (negative control) and anaphylaxis (positive control) in pre-defined risk periods immediately before and after exposure to vaccination and before and after a positive SARS-CoV-2 result, adjusted for calendar time from December 1 2020 to August 24 2021 (cells with < 5 are suppressed). Model for anaphylaxis with mRNA-1273 vaccine does not converge.**

| Group           | Time period                      | Anaphylaxis (positive control) |                     | Celiac disease (negative control) |                   |
|-----------------|----------------------------------|--------------------------------|---------------------|-----------------------------------|-------------------|
|                 |                                  | events                         | IRR (95% CI)        | events                            | IRR (95% CI)      |
| ChAdOx1 vaccine | Baseline                         | 726                            | 1.00                | 3889                              | 1.00              |
|                 | -28 to -1 days: 1st dose         | 110                            | 0.78 (0.63, 0.96)   | 718                               | 0.96 (0.88, 1.05) |
|                 | 0 day: 1st dose                  | 63                             | 11.83 (9.05, 15.47) | *                                 | 0.07 (0.02, 0.28) |
|                 | 1-7 days: 1st dose               | 60                             | 1.60 (1.22, 2.11)   | 166                               | 0.83 (0.71, 0.97) |
|                 | 8-14 days: 1st dose              | 29                             | 0.76 (0.52, 1.10)   | 211                               | 1.03 (0.90, 1.19) |
|                 | 15-21 days: 1 <sup>st</sup> dose | 43                             | 1.09 (0.79, 1.49)   | 201                               | 0.97 (0.84, 1.12) |
|                 | 22-28 days: 1st dose             | 35                             | 0.87 (0.62, 1.24)   | 205                               | 0.97 (0.84, 1.12) |
|                 | -28 to -1 days: 2nd dose         | 137                            | 0.93 (0.76, 1.13)   | 756                               | 0.91 (0.84, 0.99) |
|                 | 0 day: 2nd dose                  | 16                             | 2.97 (1.80, 4.89)   | 10                                | 0.33 (0.18, 0.61) |

|                              |                                  |     |                     |      |                   |
|------------------------------|----------------------------------|-----|---------------------|------|-------------------|
|                              | 1-7 days: 2nd dose               | 40  | 1.06 (0.77, 1.47)   | 179  | 0.85 (0.73, 0.99) |
|                              | 8-14 days: 2nd dose              | 40  | 1.06 (0.77, 1.47)   | 226  | 1.07 (0.94, 1.23) |
|                              | 15-21 days: 2nd dose             | 34  | 0.92 (0.65, 1.30)   | 251  | 1.20 (1.05, 1.36) |
|                              | 22-28 days: 2nd dose             | 50  | 1.39 (1.03, 1.86)   | 200  | 0.96 (0.83, 1.11) |
|                              |                                  |     |                     |      |                   |
|                              | 1-28 days: 1st dose              | 167 | 1.08 (0.90, 1.29)   | 783  | 0.95 (0.88, 1.04) |
|                              | 1-28 days: 2nd dose              | 164 | 1.11 (0.92, 1.33)   | 856  | 1.02 (0.94, 1.10) |
|                              |                                  |     |                     |      |                   |
| <b>BNT162b2 mRNA vaccine</b> | Baseline                         | 521 | 1.00                | 3477 | 1.00              |
|                              | -28 to -1 days: 1st dose         | 62  | 0.71 (0.54, 0.93)   | 555  | 0.95 (0.86, 1.04) |
|                              | 0 day: 1st dose                  | 39  | 12.20 (8.78, 16.95) | 7    | 0.32 (0.15, 0.66) |
|                              | 1-7 days: 1st dose               | 33  | 1.46 (1.02, 2.08)   | 120  | 0.77 (0.64, 0.93) |
|                              | 8-14 days: 1st dose              | 27  | 1.19 (0.81, 1.76)   | 145  | 0.92 (0.77, 1.08) |
|                              | 15-21 days: 1 <sup>st</sup> dose | 25  | 1.14 (0.76, 1.71)   | 139  | 0.86 (0.72, 1.02) |
|                              | 22-28 days: 1st dose             | 20  | 0.94 (0.60, 1.47)   | 147  | 0.91 (0.77, 1.08) |
|                              | -28 to -1 days: 2nd dose         | 52  | 0.94 (0.69, 1.26)   | 580  | 0.97 (0.89, 1.07) |
|                              | 0 day: 2nd dose                  | 11  | 5.00 (2.73, 9.15)   | 6    | 0.26 (0.12, 0.58) |
|                              | 1-7 days: 2nd dose               | 22  | 1.44 (0.93, 2.23)   | 148  | 0.93 (0.78, 1.09) |
|                              | 8-14 days: 2nd dose              | 17  | 1.14 (0.70, 1.87)   | 165  | 1.03 (0.88, 1.21) |
|                              | 15-21 days: 2nd dose             | 19  | 1.32 (0.82, 2.10)   | 174  | 1.11 (0.95, 1.30) |
|                              | 22-28 days: 2nd dose             | 15  | 1.07 (0.64, 1.81)   | 159  | 1.03 (0.88, 1.21) |
|                              |                                  |     |                     |      |                   |
|                              | 1-28 days: 1st dose              | 105 | 1.18 (0.95, 1.47)   | 551  | 0.87 (0.79, 0.96) |
|                              | 1-28 days: 2nd dose              | 73  | 1.26 (0.97, 1.63)   | 646  | 1.03 (0.94, 1.12) |
|                              |                                  |     |                     |      |                   |
| <b>mRNA-1273 vaccine</b>     | Baseline                         | -   | -                   | 78   | 1.00              |
|                              | -28 to -1 days: 1st dose         | -   | -                   | 15   | 1.06 (0.61, 1.84) |
|                              | 0 day: 1st dose                  | -   | -                   | *    | n/a               |
|                              | 1-7 days: 1st dose               | -   | -                   | *    | n/a               |



|                   |                                  |     |                      |     |                      |
|-------------------|----------------------------------|-----|----------------------|-----|----------------------|
|                   | 8-14 days: 1st dose              | -   | -                    | *   | 1.23 (0.45, 3.37)    |
|                   | 15-21 days: 1 <sup>st</sup> dose | -   | -                    | 5   | 1.53 (0.62, 3.80)    |
|                   | 22-28 days: 1st dose             | -   | -                    | *   | 1.49 (0.54, 4.10)    |
|                   | -28 to -1 days: 2nd dose         | -   | -                    | 8   | 1.42 (0.66, 3.08)    |
|                   | 0 day: 2nd dose                  | -   | -                    | *   | n/a                  |
|                   | 1-7 days: 2nd dose               | -   | -                    | *   | n/a                  |
|                   | 8-14 days: 2nd dose              | -   | -                    | *   | n/a                  |
|                   | 15-21 days: 2nd dose             | -   | -                    | *   | n/a                  |
|                   | 22-28 days: 2nd dose             | -   | -                    | *   | n/a                  |
|                   |                                  |     |                      |     |                      |
|                   | 1-28 days: 1st dose              | -   | -                    | 15  | 1.11 (0.62, 1.96)    |
|                   | 1-28 days: 2nd dose              | -   | -                    | *   | n/a                  |
|                   |                                  |     |                      |     |                      |
| <b>SARS-CoV-2</b> | Baseline                         | 187 | 1.00                 | 621 | 1.00                 |
|                   | -28 to -1 days: positive test    | 23  | 1.30 (0.83, 2.02)    | 111 | 1.79 (1.46, 2.21)    |
|                   | 0 day: positive test             | 14  | 21.51 (12.36, 37.45) | 51  | 22.12 (16.57, 29.53) |
|                   | 1-7 days: positive test          | 10  | 2.28 (1.20, 4.33)    | 71  | 4.39 (3.42, 5.63)    |
|                   | 8-14 days: positive test         | *   | 0.70 (0.22, 2.19)    | 55  | 3.33 (2.52, 4.40)    |
|                   | 15-21 days: positive test        | *   | 0.68 (0.22, 2.14)    | 26  | 1.54 (1.04, 2.29)    |
|                   | 22-28 days: positive test        | 8   | 1.75 (0.86, 3.58)    | 22  | 1.25 (0.82, 1.92)    |
|                   |                                  |     |                      |     |                      |
|                   | 1-28 days: positive test         | 24  | 1.35 (0.87, 2.08)    | 174 | 2.59 (2.18, 3.07)    |

**Supplementary table 8a: Incidence rate ratios (IRR 95% CI) for single outcomes in pre-defined risk periods immediately before and after exposure to vaccination, adjusted for calendar time from December 1 2020 to August 24 2021. Comparisons between different sensitivity analyses (cells with < 5 are suppressed).**

|  |  | Sensitivity 1* | Sensitivity 2* | Sensitivity 3* | Sensitivity 4* | Sensitivity 5* |
|--|--|----------------|----------------|----------------|----------------|----------------|
|--|--|----------------|----------------|----------------|----------------|----------------|

|                        |                                  | events              | IRR (95% CI)      | events            | IRR (95% CI)      | events            | IRR (95% CI)      | events            | IRR (95% CI)      | events            | IRR (95% CI)      |   |
|------------------------|----------------------------------|---------------------|-------------------|-------------------|-------------------|-------------------|-------------------|-------------------|-------------------|-------------------|-------------------|---|
| <b>Myocarditis</b>     |                                  |                     |                   |                   |                   |                   |                   |                   |                   |                   |                   |   |
| <b>ChAdOx1 vaccine</b> | Baseline                         | 523                 | 1.00              | 286               | 1.00              | 535               | 1.00              | 359               | 1.00              | 550               | 1.00              |   |
|                        | -28 to -1 days: 1st dose         | 81                  | 0.80 (0.62, 1.03) | -                 | -                 | 81                | 0.74 (0.58, 0.95) | 81                | 0.74 (0.58, 0.96) | 81                | 0.70 (0.54, 0.90) |   |
|                        | 0 day: 1st dose                  | *                   | n/a               | *                 | 0.46 (0.11, 1.89) | *                 | 0.55 (0.14, 2.19) | *                 | 0.56 (0.14, 2.24) | *                 | n/a               |   |
|                        | 1-7 days: 1st dose               | 39                  | 1.61 (1.14, 2.27) | 47                | 1.55 (1.07, 2.24) | 47                | 1.77 (1.29, 2.42) | 45                | 1.72 (1.24, 2.38) | *                 | n/a               |   |
|                        | 8-14 days: 1st dose              | 25                  | 0.97 (0.64, 1.47) | 35                | 1.11 (0.74, 1.65) | 35                | 1.22 (0.85, 1.75) | 34                | 1.22 (0.84, 1.77) | *                 | n/a               |   |
|                        | 15-21 days: 1 <sup>st</sup> dose | 22                  | 0.83 (0.54, 1.29) | 30                | 0.96 (0.63, 1.44) | 30                | 1.03 (0.71, 1.51) | 30                | 1.07 (0.73, 1.59) | *                 | n/a               |   |
|                        | 22-28 days: 1st dose             | 25                  | 0.95 (0.63, 1.44) | 30                | 0.98 (0.65, 1.46) | 30                | 1.03 (0.71, 1.51) | 27                | 0.98 (0.65, 1.47) | *                 | n/a               |   |
|                        | -28 to -1 days: 2nd dose         | 58                  | 0.66 (0.49, 0.88) | 58                | 0.68 (0.50, 0.92) | 58                | 0.65 (0.49, 0.87) | 41                | 0.68 (0.47, 0.97) | 58                | 0.58 (0.43, 0.78) |   |
|                        | 0 day: 2nd dose                  | *                   | 0.64 (0.16, 2.56) | *                 | 0.66 (0.16, 2.67) | *                 | 0.64 (0.16, 2.56) | *                 | 1.33 (0.33, 5.42) | *                 | 0.57 (0.14, 2.30) |   |
|                        | 1-7 days: 2nd dose               | 11                  | 0.50 (0.27, 0.92) | 13                | 0.62 (0.35, 1.10) | 13                | 0.60 (0.34, 1.05) | 7                 | 0.73 (0.33, 1.59) | 13                | 0.54 (0.31, 0.94) |   |
|                        | 8-14 days: 2nd dose              | 26                  | 1.20 (0.80, 1.80) | 28                | 1.37 (0.92, 2.05) | 28                | 1.31 (0.88, 1.94) | 9                 | 1.16 (0.58, 2.35) | 28                | 1.18 (0.79, 1.74) |   |
|                        | 15-21 days: 2nd dose             | 18                  | 0.84 (0.52, 1.36) | 19                | 0.97 (0.60, 1.55) | 19                | 0.91 (0.57, 1.45) | 8                 | 1.31 (0.62, 2.76) | 19                | 0.82 (0.52, 1.31) |   |
|                        | 22-28 days: 2nd dose             | 24                  | 1.13 (0.74, 1.73) | 24                | 1.25 (0.81, 1.91) | 23                | 1.12 (0.73, 1.71) | 6                 | 1.36 (0.58, 3.21) | 24                | 1.06 (0.70, 1.61) |   |
|                        |                                  |                     |                   |                   |                   |                   |                   |                   |                   |                   |                   |   |
|                        |                                  | 1-28 days: 1st dose | 111               | 1.11 (0.88, 1.39) | 142               | 1.15 (0.89, 1.50) | 142               | 1.29 (1.05, 1.59) | 136               | 1.28 (1.03, 1.60) | -                 | - |
|                        | 1-28 days: 2nd dose              | 79                  | 0.92 (0.71, 1.19) | 84                | 1.05 (0.81, 1.36) | 83                | 0.99 (0.77, 1.27) | 30                | 1.09 (0.70, 1.69) | 84                | 0.90 (0.70, 1.15) |   |
|                        |                                  |                     |                   |                   |                   |                   |                   |                   |                   |                   |                   |   |
|                        | Baseline                         | 374                 | 1.00              | 225               | 1.00              | 387               | 1.00              | 215               | 1.00              | 398               | 1.00              |   |

|                              |                                  |                     |                   |                   |                   |                   |                   |                   |                   |                   |                   |
|------------------------------|----------------------------------|---------------------|-------------------|-------------------|-------------------|-------------------|-------------------|-------------------|-------------------|-------------------|-------------------|
| <b>BNT162b2 mRNA vaccine</b> | -28 to -1 days: 1st dose         | 49                  | 0.79 (0.58, 1.08) |                   |                   | 49                | 0.75 (0.55, 1.02) | 40                | 0.71 (0.50, 1.02) | 49                | 0.74 (0.54, 1.00) |
|                              | 0 day: 1st dose                  | *                   | 0.89 (0.22, 3.56) | *                 | 0.89 (0.27, 2.89) | *                 | 1.25 (0.40, 3.89) | *                 | 1.50 (0.48, 4.70) | *                 | n/a               |
|                              | 1-7 days: 1st dose               | 23                  | 1.34 (0.87, 2.07) | 27                | 1.01 (0.62, 1.65) | 27                | 1.46 (0.98, 2.19) | 16                | 1.05 (0.62, 1.78) | *                 | n/a               |
|                              | 8-14 days: 1st dose              | 20                  | 1.17 (0.74, 1.85) | 23                | 0.85 (0.51, 1.41) | 23                | 1.24 (0.81, 1.92) | 17                | 1.12 (0.66, 1.87) | *                 | n/a               |
|                              | 15-21 days: 1 <sup>st</sup> dose | 17                  | 1.01 (0.61, 1.65) | 21                | 0.83 (0.50, 1.37) | 21                | 1.15 (0.74, 1.81) | 16                | 1.02 (0.60, 1.73) | *                 | n/a               |
|                              | 22-28 days: 1st dose             | 19                  | 1.19 (0.75, 1.91) | 23                | 1.03 (0.64, 1.65) | 23                | 1.35 (0.88, 2.07) | 18                | 1.22 (0.74, 2.02) | *                 | n/a               |
|                              | -28 to -1 days: 2nd dose         | 48                  | 0.98 (0.71, 1.34) | 48                | 0.91 (0.65, 1.29) | 48                | 0.97 (0.71, 1.33) | 45                | 0.98 (0.69, 1.41) | 48                | 0.85 (0.62, 1.17) |
|                              | 0 day: 2nd dose                  | *                   | n/a               | *                 | n/a               | *                 | n/a               | *                 | n/a               | *                 | n/a               |
|                              | 1-7 days: 2nd dose               | 21                  | 1.63 (1.03, 2.56) | 23                | 1.63 (1.03, 2.56) | 22                | 1.70 (1.09, 2.65) | 12                | 1.07 (0.59, 1.97) | 23                | 1.57 (1.02, 2.43) |
|                              | 8-14 days: 2nd dose              | 11                  | 0.87 (0.47, 1.59) | 15                | 1.13 (0.66, 1.93) | 15                | 1.19 (0.70, 2.02) | 12                | 1.21 (0.66, 2.22) | 15                | 1.05 (0.62, 1.78) |
|                              | 15-21 days: 2nd dose             | 10                  | 0.83 (0.44, 1.58) | 14                | 1.14 (0.65, 1.98) | 14                | 1.18 (0.68, 2.03) | 9                 | 1.03 (0.52, 2.07) | 14                | 1.03 (0.60, 1.77) |
|                              | 22-28 days: 2nd dose             | 12                  | 1.03 (0.57, 1.85) | 12                | 1.03 (0.57, 1.86) | 12                | 1.04 (0.58, 1.86) | 8                 | 1.11 (0.53, 2.31) | 12                | 0.91 (0.51, 1.63) |
|                              |                                  |                     |                   |                   |                   |                   |                   |                   |                   |                   |                   |
|                              |                                  | 1-28 days: 1st dose | 79                | 1.20 (0.93, 1.54) | 94                | 0.91 (0.66, 1.27) | 94                | 1.33 (1.05, 1.68) | 67                | 1.13 (0.84, 1.53) | -                 |
|                              | 1-28 days: 2nd dose              | 54                  | 1.11 (0.82, 1.51) | 64                | 1.25 (0.92, 1.69) | 63                | 1.30 (0.98, 1.74) | 41                | 1.13 (0.78, 1.66) | 64                | 1.16 (0.87, 1.54) |
|                              |                                  |                     |                   |                   |                   |                   |                   |                   |                   |                   |                   |
| <b>mRNA-1273 vaccine</b>     | Baseline                         | 22                  | 1.00              | *                 | 1.00              | 22                | 1.00              | 12                | 1.00              | 22                | 1.00              |
|                              | -28 to -1 days: 1st dose         | *                   | 0.40 (0.09, 1.82) | -                 | -                 | *                 | 0.41 (0.09, 1.84) | *                 | n/a               | *                 | 0.37 (0.08, 1.71) |
|                              | 0 day: 1st dose                  | 0                   | n/a               | *                 | n/a               | *                 | n/a               | *                 | n/a               | *                 | n/a               |

|                        |                                  |     |                     |     |                      |     |                     |     |                   |     |                     |
|------------------------|----------------------------------|-----|---------------------|-----|----------------------|-----|---------------------|-----|-------------------|-----|---------------------|
|                        | 1-7 days: 1st dose               | 7   | 8.06 (3.39, 19.14)  | 7   | 15.24 (1.65, 140.79) | 7   | 8.33 (3.50, 19.84)  | *   | n/a               | *   | n/a                 |
|                        | 8-14 days: 1st dose              | *   | n/a                 | *   | n/a                  | *   | n/a                 | *   | n/a               | *   | n/a                 |
|                        | 15-21 days: 1 <sup>st</sup> dose | *   | n/a                 | *   | n/a                  | *   | n/a                 | *   | n/a               | *   | n/a                 |
|                        | 22-28 days: 1st dose             | *   | n/a                 | *   | n/a                  | *   | n/a                 | *   | n/a               | *   | n/a                 |
|                        | -28 to -1 days: 2nd dose         | *   | 2.05 (0.42, 10.01)  | *   | n/a                  | *   | 2.18 (0.44, 10.64)  |     | n/a               | *   | 1.51 (0.32, 7.23)   |
|                        | 0 day: 2nd dose                  | *   | n/a                 | *   | n/a                  | *   | n/a                 | *   | n/a               | *   | n/a                 |
|                        | 1-7 days: 2nd dose               | *   | 21.52 (6.03, 76.79) | *   | n/a                  | *   | 26.48 (7.11, 98.58) | *   | n/a               | *   | 15.63 (4.50, 54.37) |
|                        | 8-14 days: 2nd dose              | *   | n/a                 | *   | n/a                  | *   | n/a                 | *   | n/a               | *   | n/a                 |
|                        | 15-21 days: 2nd dose             | *   | n/a                 | *   | n/a                  | *   | n/a                 | *   | n/a               | *   | n/a                 |
|                        | 22-28 days: 2nd dose             | *   | n/a                 | *   | n/a                  | *   | n/a                 | *   | n/a               | *   | n/a                 |
|                        |                                  |     |                     |     |                      |     |                     |     |                   |     |                     |
|                        | 1-28 days: 1st dose              | 9   | 2.83 (1.28, 6.27)   | 9   | 5.32 (0.60, 47.31)   | 9   | 3.01 (1.35, 6.70)   | *   | n/a               | -   | -                   |
|                        | 1-28 days: 2nd dose              | *   | 9.13 (2.50, 33.40)  | *   | n/a                  | *   | 15.25 (3.80, 61.24) | *   | n/a               | *   | 6.41 (1.81, 22.74)  |
|                        |                                  |     |                     |     |                      |     |                     |     |                   |     |                     |
| <b>Pericarditis</b>    |                                  |     |                     |     |                      |     |                     |     |                   |     |                     |
| <b>ChAdOx1 vaccine</b> | Baseline                         | 566 | 1.00                | 362 | 1.00                 | 563 | 1.00                | 360 | 1.00              | 581 | 1.00                |
|                        | -28 to -1 days: 1st dose         | 64  | 0.56 (0.43, 0.74)   | -   | -                    | 64  | 0.54 (0.41, 0.71)   | 63  | 0.53 (0.40, 0.70) | 64  | 0.54 (0.41, 0.71)   |
|                        | 0 day: 1st dose                  | *   | n/a                 | *   | n/a                  | *   | n/a                 | *   | n/a               | *   | n/a                 |
|                        | 1-7 days: 1st dose               | 17  | 0.54 (0.33, 0.88)   | 19  | 0.56 (0.34, 0.92)    | 19  | 0.58 (0.37, 0.93)   | 19  | 0.60 (0.37, 0.96) | *   | n/a                 |
|                        | 8-14 days: 1st dose              | 32  | 0.98 (0.68, 1.41)   | 34  | 0.94 (0.64, 1.39)    | 34  | 1.00 (0.70, 1.43)   | 33  | 1.01 (0.70, 1.46) | *   | n/a                 |
|                        | 15-21 days: 1 <sup>st</sup> dose | 23  | 0.67 (0.44, 1.02)   | 23  | 0.60 (0.38, 0.94)    | 23  | 0.64 (0.42, 0.98)   | 23  | 0.68 (0.44, 1.04) | *   | n/a                 |

|                              |                                  |     |                   |     |                   |     |                   |     |                   |     |                   |
|------------------------------|----------------------------------|-----|-------------------|-----|-------------------|-----|-------------------|-----|-------------------|-----|-------------------|
|                              | 22-28 days: 1st dose             | 26  | 0.74 (0.49, 1.10) | 26  | 0.65 (0.43, 0.99) | 26  | 0.70 (0.47, 1.05) | 25  | 0.73 (0.48, 1.11) | *   | n/a               |
|                              | -28 to -1 days: 2nd dose         | 58  | 0.44 (0.33, 0.58) | 58  | 0.42 (0.32, 0.57) | 58  | 0.42 (0.32, 0.56) | 41  | 0.41 (0.29, 0.58) | 58  | 0.42 (0.32, 0.56) |
|                              | 0 day: 2nd dose                  | *   | n/a               | *   | n/a               | *   | n/a               | *   | n/a               | *   | 0.20 (0.03, 1.45) |
|                              | 1-7 days: 2nd dose               | 36  | 1.11 (0.78, 1.57) | 37  | 1.13 (0.80, 1.60) | 37  | 1.11 (0.79, 1.56) | 14  | 0.80 (0.45, 1.41) | 37  | 1.11 (0.78, 1.56) |
|                              | 8-14 days: 2nd dose              | 28  | 0.87 (0.59, 1.29) | 29  | 0.91 (0.61, 1.34) | 28  | 0.86 (0.58, 1.27) | 15  | 1.02 (0.58, 1.77) | 29  | 0.88 (0.60, 1.30) |
|                              | 15-21 days: 2nd dose             | 35  | 1.11 (0.78, 1.57) | 36  | 1.15 (0.81, 1.63) | 36  | 1.12 (0.79, 1.59) | 18  | 1.47 (0.87, 2.49) | 36  | 1.12 (0.79, 1.59) |
|                              | 22-28 days: 2nd dose             | 15  | 0.49 (0.29, 0.83) | 15  | 0.51 (0.30, 0.85) | 14  | 0.46 (0.27, 0.78) | 5   | 0.58 (0.23, 1.45) | 15  | 0.48 (0.29, 0.81) |
|                              |                                  |     |                   |     |                   |     |                   |     |                   |     |                   |
|                              | 1-28 days: 1st dose              | 98  | 0.73 (0.58, 0.92) | 102 | 0.69 (0.53, 0.90) | 102 | 0.73 (0.58, 0.92) | 100 | 0.75 (0.59, 0.96) | -   | -                 |
|                              | 1-28 days: 2nd dose              | 114 | 0.90 (0.72, 1.11) | 117 | 0.93 (0.75, 1.17) | 115 | 0.89 (0.72, 1.11) | 52  | 0.96 (0.67, 1.38) | 117 | 0.90 (0.73, 1.12) |
|                              |                                  |     |                   |     |                   |     |                   |     |                   |     |                   |
| <b>BNT162b2 mRNA vaccine</b> | Baseline                         | 407 | 1.00              | 268 | 1.00              | 402 | 1.00              | 208 | 1.00              | 414 | 1.00              |
|                              | -28 to -1 days: 1st dose         | 42  | 0.63 (0.46, 0.88) | -   | -                 | 42  | 0.62 (0.45, 0.86) | 38  | 0.67 (0.47, 0.95) | 42  | 0.61 (0.44, 0.85) |
|                              | 0 day: 1st dose                  | *   | 0.75 (0.19, 3.04) | *   | 0.54 (0.13, 2.27) | *   | 0.74 (0.18, 2.97) | *   | n/a               | *   | n/a               |
|                              | 1-7 days: 1st dose               | 11  | 0.60 (0.33, 1.09) | 11  | 0.44 (0.22, 0.87) | 11  | 0.58 (0.32, 1.07) | 7   | 0.46 (0.22, 0.99) | *   | n/a               |
|                              | 8-14 days: 1st dose              | 9   | 0.47 (0.24, 0.92) | 9   | 0.39 (0.19, 0.80) | 9   | 0.46 (0.24, 0.90) | 6   | 0.39 (0.17, 0.88) | *   | n/a               |
|                              | 15-21 days: 1 <sup>st</sup> dose | 18  | 0.95 (0.59, 1.53) | 19  | 0.82 (0.49, 1.39) | 18  | 0.93 (0.57, 1.50) | 15  | 0.95 (0.55, 1.64) | *   | n/a               |
|                              | 22-28 days: 1st dose             | 20  | 1.04 (0.66, 1.65) | 20  | 0.89 (0.54, 1.46) | 20  | 1.02 (0.64, 1.61) | 18  | 1.11 (0.67, 1.83) | *   | n/a               |
|                              | -28 to -1 days: 2nd dose         | 35  | 0.48 (0.34, 0.68) | 35  | 0.45 (0.31, 0.65) | 35  | 0.47 (0.33, 0.67) | 31  | 0.48 (0.32, 0.72) | 35  | 0.45 (0.32, 0.65) |

|                          |                                  |    |                   |    |                   |    |                   |    |                   |    |                   |
|--------------------------|----------------------------------|----|-------------------|----|-------------------|----|-------------------|----|-------------------|----|-------------------|
|                          | 0 day: 2nd dose                  | *  | 1.01 (0.32, 3.15) | *  | 0.90 (0.29, 2.82) | *  | 0.99 (0.32, 3.08) | *  | 1.19 (0.38, 3.75) | *  | 0.96 (0.31, 3.01) |
|                          | 1-7 days: 2nd dose               | 12 | 0.59 (0.33, 1.06) | 12 | 0.54 (0.30, 0.98) | 12 | 0.58 (0.33, 1.04) | 8  | 0.50 (0.24, 1.02) | 12 | 0.57 (0.32, 1.02) |
|                          | 8-14 days: 2nd dose              | 16 | 0.81 (0.49, 1.35) | 16 | 0.75 (0.45, 1.26) | 16 | 0.80 (0.48, 1.33) | 13 | 0.94 (0.53, 1.69) | 16 | 0.78 (0.47, 1.30) |
|                          | 15-21 days: 2nd dose             | 20 | 1.02 (0.64, 1.61) | 21 | 1.03 (0.65, 1.62) | 21 | 1.06 (0.68, 1.66) | 15 | 1.18 (0.68, 2.06) | 21 | 1.03 (0.66, 1.61) |
|                          | 22-28 days: 2nd dose             | 26 | 1.37 (0.91, 2.05) | 26 | 1.34 (0.89, 2.02) | 25 | 1.31 (0.86, 1.98) | 14 | 1.29 (0.73, 2.29) | 26 | 1.31 (0.87, 1.97) |
|                          |                                  |    |                   |    |                   |    |                   |    |                   |    |                   |
|                          | 1-28 days: 1st dose              | 58 | 0.77 (0.58, 1.02) | 59 | 0.65 (0.45, 0.94) | 58 | 0.75 (0.57, 1.00) | 46 | 0.74 (0.53, 1.04) | -  | -                 |
|                          | 1-28 days: 2nd dose              | 74 | 0.94 (0.72, 1.22) | 75 | 0.91 (0.69, 1.19) | 74 | 0.93 (0.71, 1.21) | 50 | 0.93 (0.66, 1.31) | 75 | 0.91 (0.70, 1.19) |
|                          |                                  |    |                   |    |                   |    |                   |    |                   |    |                   |
| <b>mRNA-1273 vaccine</b> | Baseline                         | 12 | 1.00              | *  | 1.00              | 11 | 1.00              | 5  | 1.00              | 12 | 1.00              |
|                          | -28 to -1 days: 1st dose         | *  | 1.61 (0.51, 5.04) | -  | -                 | *  | 1.78 (0.56, 5.66) | *  | n/a               | *  | 1.63 (0.52, 5.12) |
|                          | 0 day: 1st dose                  | *  | n/a               | *  | n/a               | *  | n/a               | *  | n/a               | -  | -                 |
|                          | 1-7 days: 1st dose               | *  | n/a               | *  | n/a               | *  | n/a               | *  | n/a               | -  | -                 |
|                          | 8-14 days: 1st dose              | *  | n/a               | *  | n/a               | *  | n/a               | *  | n/a               | -  | -                 |
|                          | 15-21 days: 1 <sup>st</sup> dose | *  | n/a               | *  | n/a               | *  | n/a               | *  | n/a               | -  | -                 |
|                          | 22-28 days: 1st dose             | *  | n/a               | *  | n/a               | *  | n/a               | *  | n/a               | -  | -                 |
|                          | -28 to -1 days: 2nd dose         | *  | n/a               | *  | n/a               | *  | n/a               | *  | n/a               | *  | n/a               |
|                          | 0 day: 2nd dose                  | *  | n/a               | *  | n/a               | *  | n/a               | *  | n/a               | *  | n/a               |
|                          | 1-7 days: 2nd dose               | *  | n/a               | *  | n/a               | *  | n/a               | *  | n/a               | *  | n/a               |
|                          | 8-14 days: 2nd dose              | *  | n/a               | *  | n/a               | *  | n/a               | *  | n/a               | *  | n/a               |
|                          | 15-21 days: 2nd dose             | *  | n/a               | *  | n/a               | *  | n/a               | *  | n/a               | *  | n/a               |

|                           |                                  |        |                   |       |                   |        |                   |       |                   |        |                   |
|---------------------------|----------------------------------|--------|-------------------|-------|-------------------|--------|-------------------|-------|-------------------|--------|-------------------|
|                           | 22-28 days: 2nd dose             | *      | n/a               | *     | n/a               | *      | n/a               | -     | -                 | *      | n/a               |
|                           | 1-28 days: 1st dose              | *      | 1.61 (0.45, 5.85) | *     | n/a               | *      | 1.91 (0.52, 7.03) | *     | n/a               | -      | -                 |
|                           | 1-28 days: 2nd dose              | *      | n/a               | *     | n/a               | *      | n/a               | *     | n/a               | *      | n/a               |
| <b>Cardiac arrhythmia</b> |                                  |        |                   |       |                   |        |                   |       |                   |        |                   |
| <b>ChAdOx1 vaccine</b>    | Baseline                         | 116100 | 1.00              | 76686 | 1.00              | 114543 | 1.00              | 68219 | 1.00              | 118356 | 1.00              |
|                           | -28 to -1 days: 1st dose         | 17335  | 0.79 (0.77, 0.80) | -     | -                 | 17562  | 0.78 (0.76, 0.79) | 17459 | 0.78 (0.76, 0.79) | 17562  | 0.77 (0.76, 0.78) |
|                           | 0 day: 1st dose                  | 278    | 0.33 (0.29, 0.37) | 289   | 0.34 (0.30, 0.38) | 289    | 0.33 (0.30, 0.37) | 283   | 0.33 (0.29, 0.37) | *      | n/a               |
|                           | 1-7 days: 1st dose               | 5647   | 0.94 (0.91, 0.96) | 5873  | 0.97 (0.94, 1.00) | 5871   | 0.94 (0.92, 0.97) | 5789  | 0.94 (0.92, 0.97) | *      | n/a               |
|                           | 8-14 days: 1st dose              | 5755   | 0.92 (0.89, 0.94) | 5981  | 0.95 (0.93, 0.98) | 5981   | 0.93 (0.90, 0.95) | 5868  | 0.92 (0.90, 0.95) | *      | n/a               |
|                           | 15-21 days: 1 <sup>st</sup> dose | 6022   | 0.94 (0.92, 0.97) | 6243  | 0.98 (0.95, 1.01) | 6242   | 0.95 (0.92, 0.97) | 6109  | 0.95 (0.92, 0.97) | *      | n/a               |
|                           | 22-28 days: 1st dose             | 5897   | 0.91 (0.88, 0.93) | 6128  | 0.94 (0.92, 0.97) | 6127   | 0.92 (0.89, 0.94) | 5951  | 0.92 (0.89, 0.94) | *      | n/a               |
|                           | -28 to -1 days: 2nd dose         | 18474  | 0.76 (0.74, 0.77) | 18595 | 0.77 (0.76, 0.78) | 18595  | 0.75 (0.74, 0.77) | 16213 | 0.79 (0.78, 0.81) | 18595  | 0.73 (0.71, 0.74) |
|                           | 0 day: 2nd dose                  | 258    | 0.29 (0.26, 0.33) | 265   | 0.30 (0.27, 0.34) | 265    | 0.30 (0.26, 0.33) | 188   | 0.29 (0.25, 0.34) | 265    | 0.29 (0.25, 0.32) |
|                           | 1-7 days: 2nd dose               | 5126   | 0.83 (0.81, 0.85) | 5236  | 0.86 (0.84, 0.89) | 5223   | 0.84 (0.82, 0.87) | 3859  | 0.90 (0.87, 0.93) | 5236   | 0.82 (0.79, 0.84) |
|                           | 8-14 days: 2nd dose              | 5814   | 0.95 (0.93, 0.98) | 5931  | 0.99 (0.97, 1.02) | 5910   | 0.97 (0.94, 0.99) | 4041  | 1.04 (1.00, 1.08) | 5931   | 0.94 (0.91, 0.96) |
|                           | 15-21 days: 2nd dose             | 5902   | 0.99 (0.96, 1.01) | 6019  | 1.03 (1.00, 1.06) | 6003   | 1.00 (0.98, 1.03) | 3614  | 1.08 (1.04, 1.12) | 6019   | 0.97 (0.95, 1.00) |
|                           | 22-28 days: 2nd dose             | 5699   | 0.97 (0.95, 1.00) | 5833  | 1.02 (0.99, 1.05) | 5809   | 0.99 (0.97, 1.02) | 2819  | 1.10 (1.06, 1.14) | 5833   | 0.97 (0.94, 0.99) |

|                              |                                  |                     |                   |                   |                   |                   |                   |                   |                   |                   |                   |   |
|------------------------------|----------------------------------|---------------------|-------------------|-------------------|-------------------|-------------------|-------------------|-------------------|-------------------|-------------------|-------------------|---|
|                              | 1-28 days: 1st dose              | 23321               | 0.93 (0.92, 0.95) | 24225             | 0.97 (0.96, 0.99) | 24221             | 0.94 (0.93, 0.96) | 23717             | 0.94 (0.93, 0.96) | -                 | -                 |   |
|                              | 1-28 days: 2nd dose              | 22541               | 0.93 (0.92, 0.95) | 23019             | 0.98 (0.96, 0.99) | 22945             | 0.95 (0.93, 0.96) | 14333             | 1.01 (0.99, 1.03) | 23019             | 0.92 (0.91, 0.94) |   |
|                              |                                  |                     |                   |                   |                   |                   |                   |                   |                   |                   |                   |   |
| <b>BNT162b2 mRNA vaccine</b> | Baseline                         | 111705              | 1.00              | 89382             | 1.00              | 110087            | 1.00              | 55351             | 1.00              | 113968            | 1.00              |   |
|                              | -28 to -1 days: 1st dose         | 12627               | 0.73 (0.71, 0.74) | -                 | -                 | 12767             | 0.72 (0.71, 0.73) | 11805             | 0.73 (0.72, 0.75) | 12767             | 0.72 (0.71, 0.74) |   |
|                              | 0 day: 1st dose                  | 223                 | 0.32 (0.28, 0.37) | 232               | 0.30 (0.26, 0.34) | 232               | 0.33 (0.29, 0.37) | 215               | 0.34 (0.30, 0.39) | 0                 | n/a               |   |
|                              | 1-7 days: 1st dose               | 3775                | 0.77 (0.75, 0.80) | 3958              | 0.73 (0.70, 0.75) | 3956              | 0.79 (0.76, 0.81) | 3642              | 0.82 (0.79, 0.84) | 0                 | n/a               |   |
|                              | 8-14 days: 1st dose              | 4613                | 0.91 (0.88, 0.93) | 4837              | 0.88 (0.85, 0.91) | 4834              | 0.92 (0.90, 0.95) | 4452              | 0.95 (0.92, 0.98) | 0                 | n/a               |   |
|                              | 15-21 days: 1 <sup>st</sup> dose | 4787                | 0.92 (0.89, 0.95) | 4971              | 0.91 (0.88, 0.94) | 4960              | 0.93 (0.90, 0.95) | 4625              | 0.96 (0.93, 0.99) | 0                 | n/a               |   |
|                              | 22-28 days: 1st dose             | 4429                | 0.88 (0.86, 0.91) | 4593              | 0.89 (0.86, 0.92) | 4582              | 0.89 (0.86, 0.92) | 4247              | 0.92 (0.89, 0.95) | 0                 | n/a               |   |
|                              | -28 to -1 days: 2nd dose         | 14913               | 0.76 (0.74, 0.77) | 15010             | 0.74 (0.73, 0.76) | 15010             | 0.75 (0.74, 0.77) | 14499             | 0.82 (0.80, 0.84) | 15010             | 0.73 (0.71, 0.74) |   |
|                              | 0 day: 2nd dose                  | 255                 | 0.33 (0.29, 0.37) | 257               | 0.32 (0.28, 0.36) | 257               | 0.33 (0.29, 0.37) | 244               | 0.35 (0.31, 0.40) | 257               | 0.31 (0.28, 0.36) |   |
|                              | 1-7 days: 2nd dose               | 4619                | 0.85 (0.82, 0.87) | 4737              | 0.84 (0.81, 0.87) | 4712              | 0.86 (0.83, 0.88) | 4405              | 0.93 (0.90, 0.96) | 4737              | 0.83 (0.80, 0.85) |   |
|                              | 8-14 days: 2nd dose              | 5158                | 0.94 (0.91, 0.96) | 5288              | 0.94 (0.91, 0.97) | 5257              | 0.95 (0.92, 0.98) | 4708              | 1.05 (1.01, 1.08) | 5288              | 0.92 (0.89, 0.95) |   |
|                              | 15-21 days: 2nd dose             | 5365                | 0.98 (0.95, 1.01) | 5495              | 0.98 (0.96, 1.01) | 5477              | 0.99 (0.97, 1.02) | 4716              | 1.10 (1.06, 1.13) | 5495              | 0.96 (0.94, 0.99) |   |
|                              | 22-28 days: 2nd dose             | 5281                | 0.97 (0.95, 1.00) | 5427              | 0.99 (0.96, 1.01) | 5409              | 0.99 (0.97, 1.02) | 4393              | 1.11 (1.07, 1.14) | 5427              | 0.96 (0.94, 0.99) |   |
|                              |                                  |                     |                   |                   |                   |                   |                   |                   |                   |                   |                   |   |
|                              |                                  | 1-28 days: 1st dose | 17604             | 0.88 (0.86, 0.89) | 18359             | 0.87 (0.85, 0.89) | 18332             | 0.89 (0.87, 0.91) | 16966             | 0.92 (0.91, 0.94) | -                 | - |
|                              | 1-28 days: 2nd dose              | 20423               | 0.94 (0.92, 0.95) | 20947             | 0.94 (0.93, 0.96) | 20855             | 0.95 (0.94, 0.97) | 18222             | 1.04 (1.02, 1.06) | 20947             | 0.92 (0.91, 0.94) |   |



|                          |                                  |      |                   |     |                   |      |                   |     |                   |      |                   |  |
|--------------------------|----------------------------------|------|-------------------|-----|-------------------|------|-------------------|-----|-------------------|------|-------------------|--|
| <b>mRNA-1273 vaccine</b> | Baseline                         | 1221 | 1.00              | 123 | 1.00              | 1193 | 1.00              | 557 | 1.00              | 1221 | 1.00              |  |
|                          | -28 to -1 days: 1st dose         | 184  | 0.89 (0.77, 1.05) | -   | -                 | 184  | 0.91 (0.78, 1.06) | 73  | 0.92 (0.72, 1.19) | 184  | 0.90 (0.77, 1.05) |  |
|                          | 0 day: 1st dose                  | 9    | 1.31 (0.68, 2.52) | 9   | 1.08 (0.54, 2.14) | 9    | 1.34 (0.69, 2.58) | *   | 0.61 (0.09, 4.34) | 0    | n/a               |  |
|                          | 1-7 days: 1st dose               | 38   | 0.79 (0.57, 1.10) | 38  | 0.67 (0.46, 0.98) | 38   | 0.82 (0.59, 1.13) | 6   | 0.58 (0.26, 1.31) | 0    | n/a               |  |
|                          | 8-14 days: 1st dose              | 40   | 0.87 (0.63, 1.19) | 40  | 0.73 (0.51, 1.06) | 39   | 0.88 (0.64, 1.22) | 11  | 1.31 (0.71, 2.42) | 0    | n/a               |  |
|                          | 15-21 days: 1 <sup>st</sup> dose | 43   | 1.01 (0.74, 1.37) | 43  | 0.83 (0.58, 1.19) | 43   | 1.07 (0.78, 1.45) | 5   | 0.73 (0.30, 1.79) | 0    | n/a               |  |
|                          | 22-28 days: 1st dose             | 35   | 0.89 (0.63, 1.24) | 35  | 0.73 (0.50, 1.07) | 34   | 0.92 (0.65, 1.30) | 5   | 1.25 (0.51, 3.10) | 0    | n/a               |  |
|                          | -28 to -1 days: 2nd dose         | 38   | 0.65 (0.47, 0.91) | 38  | 0.59 (0.39, 0.89) | 38   | 0.67 (0.48, 0.93) | *   | n/a               | 38   | 0.66 (0.47, 0.92) |  |
|                          | 0 day: 2nd dose                  | 1    | 0.55 (0.08, 3.90) | 1   | 0.49 (0.07, 3.54) | 0    | n/a               | *   | n/a               | 1    | 0.56 (0.08, 3.99) |  |
|                          | 1-7 days: 2nd dose               | 22   | 1.88 (1.23, 2.90) | 22  | 1.68 (1.02, 2.76) | 21   | 2.10 (1.35, 3.26) | *   | n/a               | 22   | 1.93 (1.25, 2.97) |  |
|                          | 8-14 days: 2nd dose              | 13   | 1.36 (0.78, 2.36) | 13  | 1.20 (0.65, 2.20) | 11   | 1.49 (0.82, 2.73) | *   | n/a               | 13   | 1.39 (0.80, 2.42) |  |
|                          | 15-21 days: 2nd dose             | 6    | 0.82 (0.37, 1.84) | 6   | 0.72 (0.31, 1.67) | 6    | 1.22 (0.54, 2.75) | *   | n/a               | 6    | 0.84 (0.37, 1.89) |  |
|                          | 22-28 days: 2nd dose             | 7    | 1.39 (0.66, 2.95) | 7   | 1.20 (0.54, 2.64) | 6    | 2.14 (0.95, 4.86) | *   | n/a               | 7    | 1.42 (0.67, 3.02) |  |
|                          |                                  |      |                   |     |                   |      |                   |     |                   |      |                   |  |
|                          | 1-28 days: 1st dose              | 156  | 0.89 (0.75, 1.05) | 156 | 0.74 (0.57, 0.95) | 154  | 0.92 (0.77, 1.09) | 27  | 0.90 (0.60, 1.36) | -    | -                 |  |
|                          | 1-28 days: 2nd dose              | 48   | 1.43 (1.06, 1.93) | 48  | 1.26 (0.85, 1.87) | 44   | 1.75 (1.27, 2.41) | *   | n/a               | 48   | 1.46 (1.08, 1.98) |  |

\*Sensitivity 1: excluding those who died from the outcome; Sensitivity 2: restricting analysis to the period post-vaccination, without censoring at death, Sensitivity 3: restricting the study period until the 1 August 2021, Sensitivity 4: restricting the study period until the 17 May 2021, when CDC announced cases of myocarditis after BNT162b2 vaccine, Sensitivity 5: removing patients who had outcomes in the 28 days after 1 dose, but before second dose.

**Supplementary table 8b: Incidence rate ratios (IRR 95% CI) for single outcomes in pre-defined risk periods immediately before and after exposure to vaccination, adjusted for calendar time from December 1 2020 to August 24 2021. Comparisons between different sensitivity analyses (cells with < 5 are suppressed) to compare different choices of pre-risk length.**

|                        |                                  | Main   |                   | Sensitivity 6* |                   | Sensitivity 7* |                   | Sensitivity 8* |                   |
|------------------------|----------------------------------|--------|-------------------|----------------|-------------------|----------------|-------------------|----------------|-------------------|
|                        |                                  | events | IRR (95% CI)      | events         | IRR (95% CI)      | events         | IRR (95% CI)      | events         | IRR (95% CI)      |
| <b>Myocarditis</b>     |                                  |        |                   |                |                   |                |                   |                |                   |
| <b>ChAdOx1 vaccine</b> | Baseline                         | 550    | 1.00              | 689            | 1.00              | 649            | 1.00              | 366            | 1.00              |
|                        | -28 to -1 days: 1st dose         | 81     | 0.74 (0.58, 0.95) | -              | -                 | 22             | 0.42 (0.28, 0.65) | 208            | 0.94 (0.77, 1.14) |
|                        | 0 day: 1st dose                  | *      | 0.54 (0.14, 2.19) | *              | 0.61 (0.15, 2.45) | *              | 0.54 (0.13, 2.16) | *              | 0.56 (0.14, 2.27) |
|                        | 1-7 days: 1st dose               | 47     | 1.76 (1.29, 2.42) | 47             | 1.97 (1.45, 2.69) | 47             | 1.75 (1.28, 2.39) | 47             | 1.82 (1.31, 2.53) |
|                        | 8-14 days: 1st dose              | 35     | 1.22 (0.85, 1.74) | 35             | 1.36 (0.96, 1.94) | 35             | 1.21 (0.85, 1.73) | 35             | 1.25 (0.87, 1.82) |
|                        | 15-21 days: 1 <sup>st</sup> dose | 30     | 1.03 (0.71, 1.51) | 30             | 1.15 (0.79, 1.68) | 30             | 1.03 (0.71, 1.50) | 30             | 1.06 (0.71, 1.57) |
|                        | 22-28 days: 1st dose             | 30     | 1.03 (0.71, 1.51) | 30             | 1.15 (0.79, 1.68) | 30             | 1.03 (0.71, 1.50) | 30             | 1.05 (0.71, 1.56) |
|                        | -28 to -1 days: 2nd dose         | 58     | 0.65 (0.49, 0.87) | -              | -                 | 18             | 0.41 (0.25, 0.65) | 115            | 0.78 (0.61, 1.00) |
|                        | 0 day: 2nd dose                  | *      | 0.64 (0.16, 2.56) | *              | 0.71 (0.18, 2.86) | *              | 0.64 (0.16, 2.56) | *              | 0.65 (0.16, 2.60) |
|                        | 1-7 days: 2nd dose               | 13     | 0.60 (0.34, 1.04) | 13             | 0.67 (0.38, 1.16) | 13             | 0.60 (0.34, 1.04) | 13             | 0.61 (0.35, 1.07) |
|                        | 8-14 days: 2nd dose              | 28     | 1.31 (0.88, 1.93) | 28             | 1.45 (0.99, 2.14) | 28             | 1.31 (0.89, 1.94) | 28             | 1.33 (0.89, 1.98) |
|                        | 15-21 days: 2nd dose             | 19     | 0.91 (0.57, 1.45) | 19             | 1.00 (0.63, 1.59) | 19             | 0.91 (0.57, 1.45) | 19             | 0.92 (0.58, 1.48) |
|                        | 22-28 days: 2nd dose             | 24     | 1.16 (0.76, 1.76) | 24             | 1.27 (0.84, 1.93) | 24             | 1.16 (0.76, 1.76) | 24             | 1.18 (0.77, 1.81) |
|                        | 1-28 days: 1st dose              | 142    | 1.29 (1.05, 1.58) | 142            | 1.45 (1.19, 1.76) | 142            | 1.29 (1.05, 1.57) | 142            | 1.32 (1.05, 1.66) |
|                        | 1-28 days: 2nd dose              | 84     | 1.00 (0.78, 1.27) | 84             | 1.10 (0.87, 1.41) | 84             | 1.00 (0.78, 1.28) | 84             | 1.01 (0.78, 1.31) |
|                        |                                  |        |                   |                |                   |                |                   |                |                   |
|                        | Baseline                         | 398    | 1.00              | 495            | 1.00              | 460            | 1.00              | 308            | 1.00              |

|                              |                                  |                     |                    |                   |                    |                   |                    |                   |                    |
|------------------------------|----------------------------------|---------------------|--------------------|-------------------|--------------------|-------------------|--------------------|-------------------|--------------------|
| <b>BNT162b2 mRNA vaccine</b> | -28 to -1 days: 1st dose         | 49                  | 0.75 (0.55, 1.01)  | -                 | -                  | 16                | 0.48 (0.29, 0.79)  | 110               | 0.87 (0.69, 1.10)  |
|                              | 0 day: 1st dose                  | *                   | 1.24 (0.40, 3.88)  | *                 | 1.31 (0.42, 4.08)  | *                 | 1.22 (0.39, 3.80)  | *                 | 1.26 (0.40, 3.93)  |
|                              | 1-7 days: 1st dose               | 27                  | 1.45 (0.97, 2.17)  | 27                | 1.52 (1.02, 2.27)  | 27                | 1.42 (0.96, 2.12)  | 27                | 1.47 (0.98, 2.21)  |
|                              | 8-14 days: 1st dose              | 23                  | 1.23 (0.80, 1.90)  | 23                | 1.29 (0.84, 1.98)  | 23                | 1.21 (0.79, 1.86)  | 23                | 1.25 (0.81, 1.93)  |
|                              | 15-21 days: 1 <sup>st</sup> dose | 21                  | 1.14 (0.73, 1.78)  | 21                | 1.19 (0.76, 1.86)  | 21                | 1.12 (0.72, 1.75)  | 21                | 1.15 (0.73, 1.80)  |
|                              | 22-28 days: 1st dose             | 23                  | 1.33 (0.86, 2.04)  | 23                | 1.39 (0.91, 2.13)  | 23                | 1.30 (0.85, 2.00)  | 23                | 1.33 (0.86, 2.06)  |
|                              | -28 to -1 days: 2nd dose         | 48                  | 0.96 (0.70, 1.32)  | -                 | -                  | 19                | 0.73 (0.46, 1.17)  | 77                | 0.94 (0.71, 1.25)  |
|                              | 0 day: 2nd dose                  | *                   | n/a                | *                 | n/a                | *                 | n/a                | *                 | n/a                |
|                              | 1-7 days: 2nd dose               | 23                  | 1.75 (1.13, 2.70)  | 23                | 1.87 (1.22, 2.86)  | 23                | 1.72 (1.12, 2.65)  | 23                | 1.73 (1.11, 2.69)  |
|                              | 8-14 days: 2nd dose              | 15                  | 1.16 (0.69, 1.97)  | 15                | 1.24 (0.74, 2.10)  | 15                | 1.15 (0.68, 1.93)  | 15                | 1.15 (0.68, 1.96)  |
|                              | 15-21 days: 2nd dose             | 14                  | 1.14 (0.66, 1.97)  | 14                | 1.23 (0.71, 2.10)  | 14                | 1.13 (0.66, 1.94)  | 14                | 1.14 (0.66, 1.97)  |
|                              | 22-28 days: 2nd dose             | 12                  | 1.01 (0.57, 1.82)  | 12                | 1.08 (0.61, 1.94)  | 12                | 1.00 (0.56, 1.79)  | 12                | 1.01 (0.56, 1.82)  |
|                              |                                  |                     |                    | -                 | -                  |                   |                    |                   |                    |
|                              |                                  | 1-28 days: 1st dose | 94                 | 1.31 (1.03, 1.66) | 94                 | 1.38 (1.10, 1.74) | 94                 | 1.29 (1.02, 1.63) | 94                 |
|                              | 1-28 days: 2nd dose              | 64                  | 1.30 (0.98, 1.72)  | 64                | 1.38 (1.05, 1.82)  | 64                | 1.27 (0.96, 1.68)  | 64                | 1.29 (0.96, 1.73)  |
|                              |                                  |                     |                    |                   |                    |                   |                    |                   |                    |
| <b>mRNA-1273 vaccine</b>     | Baseline                         | 22                  | 1.00               | 26                | 1.00               | 24                | 1.00               | 19                | 1.00               |
|                              | -28 to -1 days: 1st dose         | *                   | 0.41 (0.09, 1.87)  | -                 | -                  | *                 | n/a                | 5                 | 0.56 (0.20, 1.56)  |
|                              | 0 day: 1st dose                  | *                   | n/a                | *                 | n/a                | *                 | n/a                | *                 | n/a                |
|                              | 1-7 days: 1st dose               | 7                   | 8.38 (3.53, 19.91) | 7                 | 8.71 (3.74, 20.27) | 7                 | 8.81 (3.74, 20.72) | 7                 | 7.88 (3.24, 19.14) |
|                              | 8-14 days: 1st dose              | *                   | n/a                | *                 | n/a                | *                 | n/a                | *                 | n/a                |
|                              | 15-21 days: 1 <sup>st</sup> dose | *                   | n/a                | *                 | n/a                | *                 | n/a                | *                 | n/a                |
|                              | 22-28 days: 1st dose             | *                   | n/a                | *                 | n/a                | *                 | n/a                | *                 | n/a                |

|                                 |                               |     |                       |     |                      |     |                       |     |                       |
|---------------------------------|-------------------------------|-----|-----------------------|-----|----------------------|-----|-----------------------|-----|-----------------------|
|                                 | -28 to -1 days: 2nd dose      | *   | 2.19 (0.45, 10.69)    | -   | -                    | *   | 4.85 (1.00, 23.55)    | *   | 1.45 (0.29, 7.32)     |
|                                 | 0 day: 2nd dose               | *   | n/a                   | *   | n/a                  | *   | n/a                   | *   | n/a                   |
|                                 | 1-7 days: 2nd dose            | *   | 23.10 (6.46, 82.56)   | *   | 20.96 (6.22, 70.69)  | *   | 25.41 (7.17, 90.06)   | *   | 20.33 (5.55, 74.43)   |
|                                 | 8-14 days: 2nd dose           | *   | n/a                   | *   | n/a                  | *   | n/a                   | *   | n/a                   |
|                                 | 15-21 days: 2nd dose          | *   | n/a                   | *   | n/a                  | *   | n/a                   | *   | n/a                   |
|                                 | 22-28 days: 2nd dose          | *   | n/a                   | *   | n/a                  | *   | n/a                   | *   | n/a                   |
|                                 |                               |     |                       |     |                      |     |                       |     |                       |
|                                 | 1-28 days: 1st dose           | 9   | 2.97 (1.34, 6.58)     | 9   | 3.02 (1.39, 6.53)    | 9   | 3.09 (1.41, 6.76)     | 9   | 2.80 (1.23, 6.37)     |
|                                 | 1-28 days: 2nd dose           | *   | 9.84 (2.69, 36.03)    | *   | 8.82 (2.55, 30.47)   | *   | 10.77 (2.97, 39.12)   | *   | 8.76 (2.34, 32.82)    |
|                                 |                               |     |                       |     |                      |     |                       |     |                       |
| <b>Positive SARS-CoV-2 test</b> | Baseline                      | 119 | 1.00                  | 151 | 1.00                 | 123 | 1.00                  | 110 | 1.00                  |
|                                 | -28 to -1 days: positive test | 32  | 2.84 (1.89, 4.28)     | -   | -                    | 28  | 4.72 (3.08, 7.21)     | 41  | 2.47 (1.68, 3.65)     |
|                                 | 0 day: positive test          | 36  | 78.21 (52.90, 115.61) | 36  | 66.92 (45.92, 97.52) | 36  | 78.39 (53.20, 115.50) | 36  | 83.72 (56.29, 124.52) |
|                                 | 1-7 days: positive test       | 68  | 21.08 (15.34, 28.96)  | 68  | 18.00 (13.32, 24.31) | 68  | 20.81 (15.20, 28.49)  | 68  | 22.44 (16.22, 31.04)  |
|                                 | 8-14 days: positive test      | 37  | 11.29 (7.70, 16.57)   | 37  | 9.62 (6.64, 13.94)   | 37  | 11.06 (7.56, 16.18)   | 37  | 11.88 (8.06, 17.52)   |
|                                 | 15-21 days: positive test     | 18  | 5.36 (3.24, 8.89)     | 18  | 4.56 (2.78, 7.49)    | 18  | 5.35 (3.24, 8.85)     | 18  | 5.58 (3.35, 9.27)     |
|                                 | 22-28 days: positive test     | 11  | 3.08 (1.65, 5.75)     | 11  | 2.64 (1.42, 4.89)    | 11  | 3.11 (1.67, 5.81)     | 11  | 3.17 (1.69, 5.94)     |
|                                 |                               |     |                       |     |                      |     |                       |     |                       |
|                                 | 1-28 days: positive test      | 134 | 9.76 (7.51, 12.69)    | 134 | 8.38 (6.56, 10.71)   | 134 | 9.73 (7.51, 12.62)    | 134 | 10.16 (7.76, 13.31)   |
|                                 |                               |     |                       |     |                      |     |                       |     |                       |
| <b>Pericarditis</b>             |                               |     |                       |     |                      |     |                       |     |                       |



|                          |                                  |    |                   |    |                   |    |                   |    |                   |
|--------------------------|----------------------------------|----|-------------------|----|-------------------|----|-------------------|----|-------------------|
|                          | -28 to -1 days: 2nd dose         | 35 | 0.47 (0.33, 0.67) | -  | -                 | 15 | 0.43 (0.26, 0.73) | 76 | 0.60 (0.46, 0.80) |
|                          | 0 day: 2nd dose                  | *  | 0.99 (0.32, 3.09) | *  | 1.23 (0.40, 3.85) | *  | 1.09 (0.35, 3.39) | *  | 0.96 (0.30, 2.99) |
|                          | 1-7 days: 2nd dose               | 12 | 0.58 (0.33, 1.04) | 12 | 0.73 (0.41, 1.29) | 12 | 0.64 (0.36, 1.14) | 12 | 0.57 (0.31, 1.02) |
|                          | 8-14 days: 2nd dose              | 16 | 0.80 (0.48, 1.32) | 16 | 0.98 (0.59, 1.63) | 16 | 0.87 (0.52, 1.44) | 16 | 0.78 (0.47, 1.30) |
|                          | 15-21 days: 2nd dose             | 21 | 1.05 (0.67, 1.64) | 21 | 1.29 (0.83, 2.01) | 21 | 1.14 (0.73, 1.78) | 21 | 1.03 (0.65, 1.62) |
|                          | 22-28 days: 2nd dose             | 26 | 1.34 (0.89, 2.02) | 26 | 1.63 (1.09, 2.44) | 26 | 1.45 (0.97, 2.17) | 26 | 1.32 (0.88, 2.00) |
|                          |                                  |    |                   |    |                   |    |                   |    |                   |
|                          | 1-28 days: 1st dose              | 59 | 0.77 (0.58, 1.02) | 59 | 0.90 (0.68, 1.19) | 59 | 0.81 (0.61, 1.08) | 59 | 0.73 (0.55, 0.98) |
|                          | 1-28 days: 2nd dose              | 75 | 0.93 (0.72, 1.21) | 75 | 1.15 (0.89, 1.48) | 75 | 1.02 (0.79, 1.31) | 75 | 0.91 (0.70, 1.20) |
|                          |                                  |    |                   |    |                   |    |                   |    |                   |
| <b>mRNA-1273 vaccine</b> | Baseline                         | 12 | 1.00              | 17 | 1.00              | 17 | 1.00              | 10 | 1.00              |
|                          | -28 to -1 days: 1st dose         | *  | 1.62 (0.52, 5.07) | -  | -                 | *  | n/a               | 6  | 1.14 (0.41, 3.19) |
|                          | 0 day: 1st dose                  | *  | n/a               | *  | n/a               | *  | n/a               | *  | n/a               |
|                          | 1-7 days: 1st dose               | *  | n/a               | *  | n/a               | *  | n/a               | *  | n/a               |
|                          | 8-14 days: 1st dose              | *  | n/a               | *  | n/a               | *  | n/a               | *  | n/a               |
|                          | 15-21 days: 1 <sup>st</sup> dose | *  | n/a               | *  | n/a               | *  | n/a               | *  | n/a               |
|                          | 22-28 days: 1st dose             | *  | n/a               | *  | n/a               | *  | n/a               | *  | n/a               |
|                          | -28 to -1 days: 2nd dose         | *  | n/a               | -  | -                 | *  | n/a               | *  | n/a               |
|                          | 0 day: 2nd dose                  | *  | n/a               | *  | n/a               | *  | n/a               | *  | n/a               |
|                          | 1-7 days: 2nd dose               | *  | n/a               | *  | n/a               | *  | n/a               | *  | n/a               |
|                          | 8-14 days: 2nd dose              | *  | n/a               | *  | n/a               | *  | n/a               | *  | n/a               |
|                          | 15-21 days: 2nd dose             | *  | n/a               | *  | n/a               | *  | n/a               | *  | n/a               |
|                          | 22-28 days: 2nd dose             | *  | n/a               | *  | n/a               | *  | n/a               | *  | n/a               |

|                                 |                                  |        |                      |        |                      |        |                      |       |                      |
|---------------------------------|----------------------------------|--------|----------------------|--------|----------------------|--------|----------------------|-------|----------------------|
|                                 | 1-28 days: 1st dose              | *      | 1.64 (0.45, 5.94)    | *      | 1.33 (0.39, 4.59)    | *      | 1.21 (0.35, 4.22)    | *     | 1.57 (0.42, 5.88)    |
|                                 | 1-28 days: 2nd dose              | *      | n/a                  | *      | n/a                  | *      | n/a                  | *     | n/a                  |
| <b>Positive SARS-CoV-2 test</b> | Baseline                         | 95     | 1.00                 | 124    | 1.00                 | 104    | 1.00                 | 88    | 1.00                 |
|                                 | -28 to -1 days: positive test    | 29     | 3.57 (2.30, 5.55)    | -      | -                    | 20     | 4.45 (2.71, 7.30)    | 36    | 2.78 (1.82, 4.25)    |
|                                 | 0 day: positive test             | 11     | 35.04 (18.47, 66.46) | 11     | 29.80 (15.92, 55.77) | 11     | 33.25 (17.62, 62.73) | 11    | 38.67 (20.30, 73.67) |
|                                 | 1-7 days: positive test          | 11     | 4.85 (2.56, 9.18)    | 11     | 4.10 (2.19, 7.66)    | 11     | 4.53 (2.40, 8.52)    | 11    | 5.30 (2.79, 10.06)   |
|                                 | 8-14 days: positive test         | 9      | 3.81 (1.90, 7.63)    | 9      | 3.18 (1.60, 6.30)    | 9      | 3.53 (1.77, 7.05)    | 9     | 4.05 (2.01, 8.14)    |
|                                 | 15-21 days: positive test        | *      | 1.63 (0.59, 4.45)    | *      | 1.35 (0.50, 3.66)    | *      | 1.52 (0.56, 4.15)    | *     | 1.67 (0.61, 4.58)    |
|                                 | 22-28 days: positive test        | *      | 1.15 (0.36, 3.66)    | *      | 0.95 (0.30, 3.00)    | *      | 1.09 (0.35, 3.46)    | *     | 1.16 (0.37, 3.69)    |
|                                 |                                  |        |                      |        |                      |        |                      |       |                      |
|                                 | 1-28 days: positive test         | 27     | 2.79 (1.80, 4.32)    | 27     | 2.33 (1.52, 3.56)    | 27     | 2.61 (1.69, 4.03)    | 27    | 2.91 (1.87, 4.53)    |
| <b>Cardiac arrhythmia</b>       |                                  |        |                      |        |                      |        |                      |       |                      |
| <b>ChAdOx1 vaccine</b>          | Baseline                         | 118356 | 1.00                 | 154513 | 1.00                 | 139316 | 1.00                 | 80393 | 1.00                 |
|                                 | -28 to -1 days: 1st dose         | 17562  | 0.78 (0.76, 0.79)    | -      | -                    | 7311   | 0.65 (0.63, 0.67)    | 40103 | 0.88 (0.87, 0.90)    |
|                                 | 0 day: 1st dose                  | 289    | 0.33 (0.30, 0.38)    | 289    | 0.37 (0.33, 0.42)    | 289    | 0.34 (0.30, 0.38)    | 289   | 0.33 (0.29, 0.37)    |
|                                 | 1-7 days: 1st dose               | 5873   | 0.94 (0.92, 0.97)    | 5873   | 1.05 (1.03, 1.08)    | 5873   | 0.96 (0.94, 0.99)    | 5873  | 0.92 (0.90, 0.95)    |
|                                 | 8-14 days: 1st dose              | 5981   | 0.93 (0.90, 0.95)    | 5981   | 1.03 (1.00, 1.05)    | 5981   | 0.95 (0.92, 0.97)    | 5981  | 0.90 (0.88, 0.93)    |
|                                 | 15-21 days: 1 <sup>st</sup> dose | 6243   | 0.95 (0.92, 0.97)    | 6243   | 1.05 (1.02, 1.07)    | 6243   | 0.97 (0.95, 1.00)    | 6243  | 0.92 (0.89, 0.94)    |
|                                 | 22-28 days: 1st dose             | 6128   | 0.92 (0.89, 0.94)    | 6128   | 1.01 (0.98, 1.04)    | 6128   | 0.94 (0.92, 0.97)    | 6128  | 0.88 (0.86, 0.91)    |
|                                 | -28 to -1 days: 2nd dose         | 18595  | 0.75 (0.74, 0.77)    | -      | -                    | 7886   | 0.65 (0.63, 0.66)    | 34017 | 0.81 (0.80, 0.82)    |





|                                 |                                  |                     |                      |                   |                      |                   |                      |                   |                      |                   |
|---------------------------------|----------------------------------|---------------------|----------------------|-------------------|----------------------|-------------------|----------------------|-------------------|----------------------|-------------------|
|                                 | 1-28 days: 1st dose              | 18359               | 0.89 (0.87, 0.90)    | 18359             | 0.99 (0.98, 1.01)    | 18359             | 0.92 (0.90, 0.93)    | 18359             | 0.85 (0.84, 0.87)    |                   |
|                                 | 1-28 days: 2nd dose              | 20947               | 0.95 (0.93, 0.96)    | 20947             | 1.06 (1.04, 1.08)    | 20947             | 0.98 (0.96, 0.99)    | 20947             | 0.92 (0.90, 0.93)    |                   |
|                                 |                                  |                     |                      |                   |                      |                   |                      |                   |                      |                   |
| <b>mRNA-1273 vaccine</b>        | Baseline                         | 1221                | 1.00                 | 1443              | 1.00                 | 1346              | 1.00                 | 929               | 1.00                 |                   |
|                                 | -28 to -1 days: 1st dose         | 184                 | 0.90 (0.77, 1.05)    | -                 | -                    | 78                | 0.78 (0.62, 0.98)    | 457               | 1.17 (1.04, 1.31)    |                   |
|                                 | 0 day: 1st dose                  | 9                   | 1.32 (0.69, 2.54)    | 9                 | 1.31 (0.68, 2.53)    | 9                 | 1.30 (0.68, 2.51)    | 9                 | 1.45 (0.75, 2.80)    |                   |
|                                 | 1-7 days: 1st dose               | 38                  | 0.80 (0.58, 1.11)    | 38                | 0.79 (0.57, 1.10)    | 38                | 0.79 (0.57, 1.10)    | 38                | 0.89 (0.64, 1.23)    |                   |
|                                 | 8-14 days: 1st dose              | 40                  | 0.88 (0.64, 1.21)    | 40                | 0.86 (0.63, 1.18)    | 40                | 0.87 (0.63, 1.19)    | 40                | 0.97 (0.71, 1.33)    |                   |
|                                 | 15-21 days: 1 <sup>st</sup> dose | 43                  | 1.02 (0.75, 1.38)    | 43                | 0.99 (0.73, 1.35)    | 43                | 1.01 (0.74, 1.37)    | 43                | 1.13 (0.83, 1.53)    |                   |
|                                 | 22-28 days: 1st dose             | 35                  | 0.90 (0.64, 1.26)    | 35                | 0.87 (0.62, 1.22)    | 35                | 0.89 (0.63, 1.25)    | 35                | 1.00 (0.71, 1.40)    |                   |
|                                 | -28 to -1 days: 2nd dose         | 38                  | 0.66 (0.47, 0.92)    | -                 | -                    | 19                | 0.68 (0.43, 1.08)    | 57                | 0.81 (0.61, 1.08)    |                   |
|                                 | 0 day: 2nd dose                  | *                   | n/a                  | *                 | n/a                  | *                 | n/a                  | *                 | n/a                  |                   |
|                                 | 1-7 days: 2nd dose               | 22                  | 1.93 (1.25, 2.96)    | 22                | 1.86 (1.21, 2.86)    | 22                | 1.92 (1.25, 2.94)    | 22                | 2.16 (1.40, 3.32)    |                   |
|                                 | 8-14 days: 2nd dose              | 13                  | 1.39 (0.80, 2.42)    | 13                | 1.34 (0.77, 2.33)    | 13                | 1.38 (0.80, 2.40)    | 13                | 1.55 (0.89, 2.71)    |                   |
|                                 | 15-21 days: 2nd dose             | 6                   | 0.84 (0.37, 1.89)    | 6                 | 0.81 (0.36, 1.82)    | 6                 | 0.84 (0.37, 1.88)    | 6                 | 0.94 (0.42, 2.12)    |                   |
|                                 | 22-28 days: 2nd dose             | 7                   | 1.43 (0.67, 3.03)    | 7                 | 1.38 (0.65, 2.93)    | 7                 | 1.42 (0.67, 3.01)    | 7                 | 1.60 (0.75, 3.40)    |                   |
|                                 |                                  |                     |                      |                   |                      |                   |                      |                   |                      |                   |
|                                 |                                  | 1-28 days: 1st dose | 156                  | 0.90 (0.76, 1.06) | 156                  | 0.88 (0.74, 1.04) | 156                  | 0.89 (0.75, 1.05) | 156                  | 0.99 (0.83, 1.18) |
|                                 |                                  | 1-28 days: 2nd dose | 48                   | 1.46 (1.08, 1.98) | 48                   | 1.41 (1.05, 1.90) | 48                   | 1.45 (1.08, 1.96) | 48                   | 1.63 (1.20, 2.21) |
|                                 |                                  |                     |                      |                   |                      |                   |                      |                   |                      |                   |
| <b>Positive SARS-CoV-2 test</b> | Baseline                         | 15119               | 1.00                 | 21737             | 1.00                 | 17222             | 1.00                 | 13499             | 1.00                 |                   |
|                                 | -28 to -1 days: positive test    | 6618                | 4.82 (4.68, 4.97)    | -                 | -                    | 4515              | 5.65 (5.46, 5.84)    | 8238              | 4.11 (3.99, 4.23)    |                   |
|                                 | 0 day: positive test             | 3847                | 69.83 (67.32, 72.43) | 3847              | 52.74 (50.93, 54.62) | 3847              | 63.41 (61.17, 65.73) | 3847              | 78.58 (75.71, 81.56) |                   |

|                           |      |                      |      |                   |      |                      |      |                      |
|---------------------------|------|----------------------|------|-------------------|------|----------------------|------|----------------------|
| 1-7 days: positive test   | 4593 | 11.73 (11.33, 12.14) | 4593 | 8.82 (8.54, 9.11) | 4593 | 10.53 (10.18, 10.88) | 4593 | 13.09 (12.64, 13.55) |
| 8-14 days: positive test  | 2643 | 6.57 (6.30, 6.85)    | 2643 | 4.90 (4.71, 5.11) | 2643 | 5.80 (5.56, 6.05)    | 2643 | 7.19 (6.89, 7.50)    |
| 15-21 days: positive test | 966  | 2.30 (2.15, 2.45)    | 966  | 1.71 (1.61, 1.83) | 966  | 2.05 (1.92, 2.18)    | 966  | 2.47 (2.31, 2.64)    |
| 22-28 days: positive test | 738  | 1.67 (1.55, 1.80)    | 738  | 1.25 (1.16, 1.34) | 738  | 1.51 (1.41, 1.63)    | 738  | 1.76 (1.64, 1.90)    |
| 1-28 days: positive test  | 8940 | 5.35 (5.21, 5.50)    | 8940 | 4.03 (3.93, 4.13) | 8940 | 4.80 (4.68, 4.93)    | 8940 | 5.79 (5.63, 5.95)    |

\*Sensitivity 6: including pre-risk into baseline; Sensitivity 7: restricting pre-risk to two weeks; Sensitivity 8: increasing pre-risk to 8 weeks.

**Supplementary table 9: Age distribution of vaccinated patients with each outcome in the study period and in the period restricted until the 17 May 20201.**

|                           | Myocarditis                  |                                  |                              |                                  |                              |                                  |
|---------------------------|------------------------------|----------------------------------|------------------------------|----------------------------------|------------------------------|----------------------------------|
|                           | ChAdOx1                      |                                  | BNT162b2                     |                                  | mRNA-1273                    |                                  |
|                           | <i>Complete study period</i> | <i>Restricted to 17 May 2021</i> | <i>Complete study period</i> | <i>Restricted to 17 May 2021</i> | <i>Complete study period</i> | <i>Restricted to 17 May 2021</i> |
| <b>Number of patients</b> | 919                          | 898                              | 657                          | 504                              | 39                           | 8                                |
| <b>Age</b>                |                              |                                  |                              |                                  |                              |                                  |
| Mean age (SD)             | 57 (45, 70)                  | 57 (45, 70)                      | 58 (36, 74)                  | 64 (51, 77)                      | 30 (22, 38)                  | 41 (28, 47)                      |
| 16-29 years               | 7.3 (67)                     | 7.2 (65)                         | 14.0 (92)                    | 6.3 (32)                         | 48.7 (19)                    | *                                |
| 30-39 years               | 9.0 (83)                     | 9.1 (82)                         | 15.7 (103)                   | 7.5 (38)                         | 30.8 (12)                    | *                                |
| 40+ years                 | 83.7 (769)                   | 83.6 (751)                       | 70.2 (461)                   | 86.1 (434)                       | 20.5 (8)                     | 62.5 (5)                         |

**Supplementary table 10: Measures of effect of vaccinations and SARS-CoV-2 infections presented in absolute terms, number needed to expose for one excess event; excess events due to exposure; excess events per 1 million exposed. Only significant increased risks were**

reported over the 1-28 days post exposure. When IRR were not significant over the 1-28 days post-vaccine, absolute measures were not given.

|                              | IRR (95% CI)<br>1-28 days* | Number needed to expose to cause one<br>excess event (95% CI) | Excess events per 1,000,000 exposed<br>(95% CI) |
|------------------------------|----------------------------|---------------------------------------------------------------|-------------------------------------------------|
| <b>Myocarditis</b>           |                            |                                                               |                                                 |
| with 1st dose of ChAdOx1     | 1.29 (1.05, 1.58)          | 649,082 (394,227 – 3,157,549)                                 | 2 (0, 3)                                        |
| with 2nd dose of ChAdOx1     | 1.00 (0.78, 1.27)          | -                                                             | -                                               |
| with 1st dose of BNT162b2    | 1.31 (1.03, 1.66)          | 760577 (453,568 – 5,353,966)                                  | 1 (0, 2)                                        |
| with 2nd dose of BNT162b2    | 1.30 (0.98, 1.72)          | -                                                             | -                                               |
| with 1st dose of mRNA-1273   | 2.97 (1.34, 6.58)          | 168,612 (131,832 – 442,126)                                   | 6 (2, 8)                                        |
| with 2nd dose of mRNA-1273   | 9.84 (2.69, 36.03)         | 102,625 (94,830 – 146,797)                                    | 10 (7, 11)                                      |
| with SARS-CoV-2 infection    | 9.76 (7.51, 12.69)         | 25,183 (24,537 – 26,077)                                      | 40 (38, 41)                                     |
| <b>Myocarditis (&lt; 40)</b> |                            |                                                               |                                                 |
| with 1st dose of ChAdOx1     | 0.92 (0.55, 1.55)          | -                                                             | -                                               |
| with 2nd dose of ChAdOx1     | 1.50 (0.88, 2.55)          | -                                                             | -                                               |
| with 1st dose of BNT162b2    | 1.83 (1.20, 2.79)          | 549,501 (388,931 – 1,479,310)                                 | 2 (1, 3)                                        |
| with 2nd dose of BNT162b2    | 3.40 (1.91, 6.04)          | 292,742 (247,620 – 432,998)                                   | 3 (2, 4)                                        |
| with 1st dose of mRNA-1273   | 3.89 (1.60, 9.44)          | 131,834 (109,515 – 261,052)                                   | 8 (4, 9)                                        |
| with 2nd dose of mRNA-1273   | 20.71 (4.02, 106.68)       | 65,423 (62,853 – 82,867)                                      | 15 (12, 16)                                     |
| with SARS-CoV-2 infection    | 4.06 (2.21, 7.45)          | 102,479 (89,197 – 141,044)                                    | 10 (7, 11)                                      |
| <b>Pericarditis</b>          |                            |                                                               |                                                 |
| with 1st dose of ChAdOx1     | 0.74 (0.59, 0.92)          | -                                                             | -                                               |
| with 2nd dose of ChAdOx1     | 0.91 (0.73, 1.13)          | -                                                             | -                                               |
| with 1st dose of BNT162b2    | 0.77 (0.58, 1.02)          | -                                                             | -                                               |
| with 2nd dose of BNT162b2    | 0.93 (0.72, 1.21)          | -                                                             | -                                               |
| with 1st dose of mRNA-1273   | 1.64 (0.45, 5.94)          | -                                                             | -                                               |
| with 2nd dose of mRNA-1273   | n/a                        | -                                                             | -                                               |
| with SARS-CoV-2 infection    | 2.79 (1.80, 4.32)          | 174,970 (145,934 – 253,102)                                   | 6 (4, 7)                                        |
| <b>Cardiac arrhythmia</b>    |                            |                                                               |                                                 |
| with 1st dose of ChAdOx1     | 0.94 (0.93, 0.96)          | -                                                             | -                                               |
| with 2nd dose of ChAdOx1     | 0.95 (0.94, 0.96)          | -                                                             | -                                               |
| with 1st dose of BNT162b2    | 0.89 (0.87, 0.90)          | -                                                             | -                                               |

|                            |                   |                           |                   |
|----------------------------|-------------------|---------------------------|-------------------|
| with 2nd dose of BNT162b2  | 0.95 (0.93, 0.96) | -                         | -                 |
| with 1st dose of BNT162b2  | 0.90 (0.76, 1.06) | -                         | -                 |
| with 2nd dose of mRNA-1273 | 1.46 (1.08, 1.98) | 24,335 (15,547 – 103,369) | 41 (10, 64)       |
| with SARS-CoV-2 infection  | 5.35 (5.21, 5.50) | 416 (414 - 419)           | 2400 (2385, 2415) |

**Supplementary table 11: ICD-10 codes used to identify cases with each outcome.**

| Composite outcomes  | ICD-10 code and description                                                                                                                                                                                                                                                                                                                                                                                                                                                                                                                 |
|---------------------|---------------------------------------------------------------------------------------------------------------------------------------------------------------------------------------------------------------------------------------------------------------------------------------------------------------------------------------------------------------------------------------------------------------------------------------------------------------------------------------------------------------------------------------------|
| <b>Myocarditis</b>  | I40 - Acute myocarditis<br>I400 - Infective myocarditis<br>I401 - Isolated myocarditis<br>I408 - Other acute myocarditis<br>I409 - Acute myocarditis, unspecified<br>I41 - Myocarditis in diseases classified elsewhere<br>I410 - Myocarditis in bacterial diseases classified elsewhere<br>I411 - Myocarditis in viral diseases classified elsewhere<br>I412 - Myocarditis in other infectious and parasitic diseases classified elsewhere<br>I418 - Myocarditis in other diseases classified elsewhere<br>I514 - Myocarditis, unspecified |
| <b>Pericarditis</b> | I010 - Acute rheumatic pericarditis<br>I092 - Chronic rheumatic pericarditis<br>I30 - Acute pericarditis<br>I300 - Acute nonspecific idiopathic pericarditis<br>I301 - Infective pericarditis<br>I308 - Other forms of acute pericarditis<br>I309 - Acute pericarditis, unspecified<br>I310 - Chronic adhesive pericarditis<br>I311 - Chronic constrictive pericarditis<br>I32 - Pericarditis in diseases classified elsewhere                                                                                                              |

|                                          |                                                                                                                                                                                                                                                                                                                                                                                                                                                                                                                                                                                                                                                                                                                                                                                                                                                          |
|------------------------------------------|----------------------------------------------------------------------------------------------------------------------------------------------------------------------------------------------------------------------------------------------------------------------------------------------------------------------------------------------------------------------------------------------------------------------------------------------------------------------------------------------------------------------------------------------------------------------------------------------------------------------------------------------------------------------------------------------------------------------------------------------------------------------------------------------------------------------------------------------------------|
|                                          | <p>I320 - Pericarditis in bacterial diseases classified elsewhere<br/> I321 - Pericarditis in other infectious and parasitic diseases classified elsewhere<br/> I328 - Pericarditis in other diseases classified elsewhere</p>                                                                                                                                                                                                                                                                                                                                                                                                                                                                                                                                                                                                                           |
| <b>Cardiac arrhythmia</b>                |                                                                                                                                                                                                                                                                                                                                                                                                                                                                                                                                                                                                                                                                                                                                                                                                                                                          |
| <b>Atrial fibrillation and flutter</b>   | <p>I48 - Atrial fibrillation and flutter<br/> I480 - Paroxysmal atrial fibrillation<br/> I481 - Persistent atrial fibrillation<br/> I482 - Chronic atrial fibrillation<br/> I483 - Typical atrial flutter<br/> I484 - Atypical atrial flutter<br/> I489 - Atrial fibrillation and atrial flutter, unspecified<br/> I48X - Atrial fibrillation and flutter<br/> I471 - Supraventricular tachycardia</p>                                                                                                                                                                                                                                                                                                                                                                                                                                                   |
| <b>AV block and conduction disorders</b> | <p>I44 - Atrioventricular and left bundle-branch block<br/> I440 - Atrioventricular block, first degree<br/> I441 - Atrioventricular block, second degree<br/> I442 - Atrioventricular block, complete<br/> I443 - Other and unspecified atrioventricular block<br/> I444 - Left anterior fascicular block<br/> I445 - Left posterior fascicular block<br/> I446 - Other and unspecified fascicular block<br/> I447 - Left bundle-branch block, unspecified<br/> I45 - Other conduction disorders<br/> I450 - Right fascicular block<br/> I451 - Other and unspecified right bundle-branch block<br/> I452 - Bifascicular block<br/> I453 - Trifascicular block<br/> I454 - Nonspecific intraventricular block<br/> I455 - Other specified heart block<br/> I458 - Other specified conduction disorders<br/> I459 - Conduction disorder, unspecified</p> |

|                                          |                                                                                                                                                                                                                                                                                                                                                                                                                                                                                                                                                                                       |
|------------------------------------------|---------------------------------------------------------------------------------------------------------------------------------------------------------------------------------------------------------------------------------------------------------------------------------------------------------------------------------------------------------------------------------------------------------------------------------------------------------------------------------------------------------------------------------------------------------------------------------------|
| <b>Ventricular tachycardia</b>           | I47 - Paroxysmal tachycardia<br>I470 - Re-entry ventricular arrhythmia<br>I472 - Ventricular tachycardia<br>I479 - Paroxysmal tachycardia, unspecified                                                                                                                                                                                                                                                                                                                                                                                                                                |
| <b>Ventricular fibrillation</b>          | I490 - Ventricular fibrillation and flutter                                                                                                                                                                                                                                                                                                                                                                                                                                                                                                                                           |
| <b>Other cardiac cardiac arrhythmias</b> | I456 - Pre-excitation syndrome<br>I49 - Other cardiac arrhythmias<br>I491 - Atrial premature depolarization<br>I492 - Junctional premature depolarization<br>I493 - Ventricular premature depolarization<br>I494 - Other and unspecified premature depolarization<br>I495 - Sick sinus syndrome<br>I498 - Other specified cardiac arrhythmias<br>I499 - Cardiac arrhythmia, unspecified<br>R00 - Abnormalities of heart beat<br>R000 - Tachycardia, unspecified<br>R001 - Bradycardia, unspecified<br>R002 - Palpitations<br>R008 - Other and unspecified abnormalities of heart beat |
| <b>Coeliac</b>                           | K900 - Coeliac disease                                                                                                                                                                                                                                                                                                                                                                                                                                                                                                                                                                |
| <b>Anaphylaxis</b>                       | T780 - Anaphylactic shock due to adverse food reaction<br>T782 - Anaphylactic shock, unspecified<br>T805 - Anaphylactic shock due to serum<br>T886 - Anaphylactic shock due to adverse effect of correct drug or medicament properly administered                                                                                                                                                                                                                                                                                                                                     |
